1 **Metabolic constraints drive self-organization of specialized cell groups**

2 Sriram Varahan<sup>1</sup>, Adhish Walvekar<sup>1</sup>, Vaibhav Sinha<sup>2,3</sup>, Sandeep Krishna<sup>2</sup> and Sunil Laxman<sup>1\*</sup>

3 <sup>1</sup>InStem - Institute for Stem Cell Science and Regenerative Medicine, Bangalore 560065

4 <sup>2</sup>Simons Centre for the Study of Living Machines, National Centre for Biological Sciences-Tata Institute of  
5 Fundamental Research, Bangalore 560065

6 <sup>3</sup>Manipal Academy of Higher Education, Manipal, Karnataka, India-576104

7 \*Correspondence: [sunil@instem.res.in](mailto:sunil@instem.res.in)

8

9 **Abstract**

10 How phenotypically distinct states in isogenic cell populations appear and stably co-exist remains an  
11 unresolved question. We find that within a clonal yeast colony developing in low glucose, cells arrange  
12 into metabolically disparate cell groups. Using this system, we model and experimentally identify  
13 metabolic constraints sufficient to drive such assembly. Beginning in a gluconeogenic state, cells in a  
14 contrary state, exhibiting high pentose phosphate pathway activity, spontaneously appear and  
15 proliferate, in a spatially constrained manner. The gluconeogenic cells in the developing colony produce  
16 a resource, which we identify as trehalose. At threshold concentrations of trehalose, cells in the new  
17 metabolic state emerge and proliferate. A self-organized system establishes, where cells in this new  
18 state are sustained by trehalose consumption, which thereby restrains other cells in the trehalose  
19 producing, gluconeogenic state. Our work suggests simple physico-chemical principles that determine  
20 how isogenic cells spontaneously self-organize into structured assemblies in complimentary, specialized  
21 states.

22

23

24 **Introduction:**

25           Groups of single, isogenic cells, during the course of development, often form spatially  
26 organized, interdependent communities. The emergence of phenotypically heterogeneous, spatially  
27 constrained sub-populations of cells is considered a requisite first step towards multicellularity. Here,  
28 isogenic cells proliferate and differentiate into phenotypically distinct cells that stably coexist, and  
29 organize spatially with distinct patterns and shapes (Newman, 2016; Niklas, 2014). This ability allows  
30 groups of cells to maintain orientation, stay together, and specialize in different tasks through the  
31 division of labor, all organized with intricate spatial arrangements (Ackermann, 2015; Newman, 2016). In  
32 eukaryotic and prokaryotic microbes, the organization into structured, isogenic but phenotypically  
33 heterogeneous communities, is widely prevalent, and also reversible (Ackermann, 2015). One well  
34 studied example come from the *Dictyostelid* social amoeba, which upon starvation transition from  
35 individual protists to collective cellular aggregates that go on to form slime moulds, or fruiting bodies  
36 (Bonner, 1949; Du et al., 2015; Kaiser, 1986). Indeed, most microbes show some such complex,  
37 heterogeneous behavior, for example in the extensive spatial organization within clonal bacterial  
38 biofilms and swarms (Kearns et al., 2004; Kolter, 2007), or in the individuality exhibited in *Escherichia*  
39 *coli* populations (Spudich and Koshland, 1976). Despite its perception as a unicellular microbe, natural  
40 isolates of the budding yeast, *Saccharomyces cerevisiae*, also form phenotypically heterogeneous  
41 multicellular communities (Cáp et al., 2012; Koschwanez et al., 2011; Palková and Váchová, 2016;  
42 Ratcliff et al., 2012; Váchová and Palková, 2018; Veelders et al., 2010; Wloch-Salamon et al., 2017).  
43 However, the rules governing the emergence and maintenance of new phenotypic states within isogenic  
44 cell populations remain unclear.

45           Current studies emphasize genetic and epigenetic changes that are required to maintain  
46 phenotypic heterogeneity within a cell population (Ackermann, 2015; Sneppen et al., 2015). In  
47 particular, cells can produce adhesion molecules to bring themselves together (Halfmann et al., 2012;  
48 Halme et al., 2004; Octavio et al., 2009; Váchová and Palková, 2018), or support possible co-  
49 dependencies within the populations. However, these studies do not provide an underlying biochemical  
50 logic to explain how distinct, specialized cell states can emerge and persist in the first place. This is more  
51 so in isogenic, and therefore putatively identical, cells in seemingly uniform environments. Contrastingly,  
52 a common theme in all described examples is the requirement of some ‘metabolic stress’ or nutrient  
53 availability that is necessary for the emergence of phenotypic heterogeneity and spatial organization,  
54 often in the form of metabolically inter-dependent cells (Ackermann, 2015; Campbell et al., 2016; Cáp et  
55 al., 2012; Johnson et al., 2012; Liu et al., 2015). Experimentally, systems-engineered metabolic  
56 dependencies between non-isogenic cells can result in interdependent populations that constitute  
57 mixed communities (Campbell et al., 2016, 2015; Embree et al., 2015; Wintermute and Silver, 2010).  
58 These findings suggest that biochemical constraints derived from metabolism may determine the nature  
59 of phenotypic heterogeneity, and the spatial organization of cells within the population. It is therefore  
60 important to understand what these constraints are, and how they can explain the self-organization of  
61 genetically identical cells into distinct states. Here, using clonal yeast cells, we experimentally and  
62 theoretically show how metabolic constraints imposed on a population of isogenic cells can determine  
63 shared resource production, utilization, and the spontaneous emergence of cells exhibiting a counter-  
64 intuitive metabolic state. These constraints drive the overall self-organization of genetically identical  
65 cells into specialized, spatially ordered communities.

66

67 **Results:**

68 **Cells within *S. cerevisiae* colonies exhibit ordered metabolic specialization.**

69 Using a well-studied *S. cerevisiae* isolate as a model (Reynolds and Fink, 2001), we established a simple  
70 system to study the formation of a clonal colony with irregular morphology. On 2% agar plates  
71 containing a complex rich medium with low glucose, *S. cerevisiae* forms rugose colonies with distinct  
72 architecture, after ~5-6 days (Fig 1A). Such colonies do not form in typical, high (1-2%) glucose medium  
73 (Figure 1A). Thus, as previously shown (Granek and Magwene, 2010; Reynolds and Fink, 2001), glucose  
74 limitation (with other nutrients being non-limiting) drives this complex colony architecture formation.  
75 Currently, the description of such colonies is restricted to this external rugose morphology. With such a  
76 description, as observed in Figure 1A, the colony surface has an internal circle and some radial streaks  
77 near the periphery. We carried out a more detailed observation of entire colonies under a microscopic  
78 bright-field (using a 4x lens). This unexpectedly revealed distinct internal patterning, and apparent  
79 spatial organization of cells within (Figure 1B). As categorized purely based on visual optical density  
80 ('dark' or 'light'), regions between the colony center and periphery had optically dense (dark) networks  
81 spanning the circumference of the colony, interspersed with optically rare regions. In contrast, the  
82 periphery of the colony appeared entirely light (Figure 1B). Based simply on these optical traits alone,  
83 we categorized cells present in these regions of the colony as dark cells and light cells (Figure 1B). At this  
84 point, our description is visual and qualitative, and does not imply any other difference in the cells in  
85 either region. However, this visual description is both robust and simple, and we use this nomenclature  
86 for the remainder of this manuscript.

87 Since these structured colonies form only in glucose-limited conditions, we hypothesized that  
88 dissecting the expected metabolic requirements during glucose limitation might reveal drivers of this  
89 internal organization. To explore this hypothesis, we first designed visual indicators for hallmarks of  
90 yeast cell growth in low glucose. Under glucose-limited conditions, all cells would be expected to have  
91 constitutively high expression of the high-affinity hexokinase (Hxk1p) (Lobo and Maitra, 1977; Rodríguez

92 et al., 2001). Further, during glucose-limited growth, all cells are expected to carry out extensive  
93 gluconeogenesis, as the default metabolic state (Broach, 2012; Haarasilta and Oura, 1975; Yin et al.,  
94 2000). We therefore designed two different fluorescent reporters, one dependent on *HXK1* expression  
95 (mCherry under the *HXK1* gene promoter), and the second on *PCK1* expression as an indicator of  
96 gluconeogenic activity (mCherry under the *PCK1* gene promoter) (Figure S1A). These reporters were  
97 expressed in cells, seeded to develop into colonies, and the expression levels of these were observed in  
98 the mature, rugose colony (5-6 days). Expectedly, the *HXK1* dependent reporter showed constitutive,  
99 high expression in all cells across the entire colony (Figure 1C). Contrastingly, only the dark cells  
100 exhibited high gluconeogenesis reporter activity, which was entirely lacking in the light cells (Figure 1C).  
101 To quantify this, cells were dissected out from dark or light regions respectively (under the light  
102 microscope, using a fine needle), and the percentage of fluorescent cells in each region was measured  
103 using flow cytometry. Based on flow cytometric readouts, >80% of the dark cells showed strong  
104 fluorescence for the gluconeogenic reporter, while the light cells (~97%) were non-fluorescent (Figure  
105 1C, Figure S1B). This suggested a spatial restriction of gluconeogenic activity to within only the dark cell  
106 region. We therefore directly estimated native protein amounts of enzymes associated with  
107 gluconeogenesis (Pck1- phosphoenolpyruvate carboxykinase, Fbp1- fructose-1,6-bisphosphatase, and  
108 Icl1- Isocitrate lyase which is part of the glyoxylate shunt active during gluconeogenesis) in isolated light  
109 cells and dark cells. Only the dark cells showed expression of gluconeogenic enzymes (Figure 1D). Finally,  
110 we measured steady-state amounts of trehalose and glycogen within dark and light cells, using these  
111 metabolites as unambiguous readouts of the biochemical outputs of gluconeogenesis (François et al.,  
112 n.d.). We observed that the dark cells had substantially higher amounts of both trehalose and glycogen  
113 (Figure 1E), indicating greater gluconeogenic activity in these cells. Collectively, these results reveal that  
114 intracellular gluconeogenic activity is spatially restricted to specific regions, resulting in a distinct pattern  
115 of metabolically specialized zones within the colony.

116 **Cells organize into spatially restricted, contrary metabolic states within the colony.**

117 In the given nutrient conditions of low glucose, gluconeogenesis is expected to be a constitutive  
118 metabolic process, essential for all cells. This can therefore be considered as a necessary, permitted  
119 metabolic state in this condition. Paradoxically, in these mature colonies, gluconeogenic activity was  
120 spatially restricted to only within the dark cell region, with no discernible gluconeogenic activity in the  
121 cells located in the light region. This absence of gluconeogenic activity in these light cells, concomitant  
122 with a constitutively high level of hexokinase activity, therefore poses a biochemical paradox. What  
123 might the metabolic state of these light cells be? To address this, we first compared the ability of freshly  
124 isolated light and dark cells to proliferate in both gluconeogenic (low glucose), and non-gluconeogenic  
125 (high glucose) growth conditions. Isolated light cells and dark cells were inoculated either into a medium  
126 where gluconeogenesis is essential (ethanol+glycerol as a sole carbon source), or in high glucose  
127 medium where cells rely on high glycolytic and pentose phosphate pathway (PPP) activity, and initial  
128 growth was monitored. Here, cells that had been growing in high glucose were used as a control.  
129 Expectedly, the dark cells proliferated with minimal lag when transferred to the gluconeogenic medium  
130 (Figure 2A). However, the light cells showed an extended lag phase in this medium (Figure 2A).  
131 Conversely, light cells grew robustly and with minimum lag when transferred to the high glucose  
132 medium, as compared to the dark cells (Figure 2A). Counter-intuitively, this indicated that despite being  
133 in a low-glucose environment, the metabolic state of light cells was suited for growth in high glucose.

134 In the presence of glucose, yeast cells typically show high glycolytic and PPP activities, as part of  
135 the Crabtree (analogous to the Warburg) effect (Crabtree, 1929; De Deken, 1966) (Figure 2B). Therefore,  
136 if the light cells in the colony were indeed behaving as though present in glucose-replete conditions,  
137 they should exhibit high PPP activity. To test this, we designed a fluorescent PPP-activity reporter  
138 (mCherry under the control of the transketolase 1 (*TKL1*) (Walfridsson et al., 1995) gene promoter,  
139 Figure S1A), and monitored reporter activity across the mature colony. Indeed, only the light cells

140 exhibited high PPP-reporter activity (Figure 2C). Next, we directly assessed if the biochemical outputs  
141 corresponding to high PPP activity were high in the light cells. High nucleotide synthesis is a canonical  
142 consequence of enhanced PPP activity (Nelson and Cox, 2013). The carbon backbone (ribose-5-  
143 phosphate) of newly synthesized nucleotides is derived from the PPP, while the nitrogen backbone  
144 comes from amino acids (Nelson and Cox, 2013) (Figure 2B, Table 2). We devised a metabolic flux-based  
145 experimental approach to assess *de novo* nucleotide biosynthesis in light and dark cells, as an end-point  
146 readout indicative of high PPP activity. Light and dark cells, isolated from colonies were pulsed with a  
147 <sup>15</sup>N-label (ammonium sulfate+aspartate), and incorporation of this label into nucleotides was measured  
148 by liquid chromatography/mass spectrometry (LC/MS/MS). Light cells had higher flux into nucleotide  
149 biosynthesis, compared to the dark cells (Figure 2D, Table 2). Taken together, light cells exhibit the  
150 metabolic hallmarks of cells growing in glucose-replete conditions, including increased PPP activity, and  
151 increased nucleotide biosynthesis. Thus, in the spatially organized colony, the light cells and dark cells  
152 have contrary metabolic states. This is despite the prediction that the gluconeogenic state, exhibited by  
153 the dark cells, is the plausible metabolic state in the given growth conditions.

154 Notably, the light cells or dark cells, when isolated and reseeded as a new colony, both develop  
155 into indistinguishable, complex colonies (Figure 2E). This reiterates that these phenotypic differences  
156 between the light and dark cells are fully reversible, and do not require genetic changes. Collectively,  
157 these data reveal that cells organize into spatially separated, metabolically specialized regions. Within  
158 these regions, cells exhibit complimentary metabolic states, one of which is counter-intuitive and cannot  
159 obviously be sustained given the external nutrient environment.

160

161 **A mathematical model suggests constraints for the emergence and organization of cells in**  
162 **complimentary metabolic states.**

163 What determines the emergence and spatial organization of a group of cells, in these contrary metabolic  
164 states? Particularly, what explains the emergence and proliferation of the light cells, which exhibit a  
165 counter intuitive metabolic state, while maintaining some subset of cells in the dark state? To address  
166 this, we built a simple mathematical model. This model incorporates simple processes derived from our  
167 current experimental data, to simulate the formation of a colony of 'light' and 'dark' cells. The model  
168 was intentionally coarse-grained, since its purpose was only to find a minimal, biologically consistent  
169 combination of processes that is sufficient to produce the overall spatial structure and composition of  
170 cell states observed in the colonies. The intention behind the model was not to decipher all possible  
171 molecular details that explain this phenomenon. The model should sufficiently account for both the  
172 emergence of light cells, as well as their spatial organization with dark cells. Therefore, such a model  
173 could suggest constraints that determine the emergence of light cells, which can then be experimentally  
174 tested.

175 While building our model, we included a range of processes that must be considered, based on  
176 our experimental data thus far (Figure 3A). This includes the dark cells switching to a light state, the  
177 production of some resource by dark cells, diffusion parameters for the resource, consumption of the  
178 resource, and rates of cell division (Figure 3A). Next, we constructed a two-dimensional square grid of  
179 'locations' for groups of cells within the colony (Figure 3B), where each location is either empty or  
180 occupied by a group of ~100 cells (also see Materials and Methods for full details). Note: we  
181 intentionally coarse-grain the grid (for computational simplicity to simulate colony sizes comparable to  
182 real colonies) by approximating that the locations either consist of all light or all dark cells. At each time  
183 step (12 min of real time), the processes shown in Figure 3A are executed all across the spatial grid using  
184 the outlined algorithm (Figure 3C). In this algorithm, (i) all cells consume available nutrients (present in  
185 saturating amounts), while glucose concentrations are negligible, (ii) dark cells grow and divide in the  
186 given conditions, (iii) dark cells produce a resource/resources as a consequence of their existing



187 gluconeogenic state, (iv) this resource diffuses around the grid and is freely available, (v) dark cells  
188 switch to the light state if sufficient resource is present at their location, and lastly, (vi) the resource can  
189 sustain the light state cells, which can expand if there is an empty location in the neighborhood, and if  
190 the resource is not there the light cells can switch back to dark. All processes occur at specified rates,  
191 allowing for stochasticity. Finally, this existence of a shared resource is surmised because, logically the  
192 emergence of light cells from dark can happen only if the local nutrient environment enables a switch to  
193 the new metabolic state.

194 In each simulation, empty grids are seeded with 1257 occupied locations, with 95-99% of the  
195 cells in the dark state. After ~750 time steps (corresponding to ~6 days) a simulated wild-type colony  
196 looks typically as shown in Figure 4D (also see Figure S2 and Video S1). Strikingly, the simulated spatial  
197 organization (Figure 3D, S2 and Video S1) recapitulates most features of a real colony (Figure 3D). These  
198 are: at the edge of the initial circular inoculation is a ring of dark cells, the outermost part of the colony  
199 is made up of outcrops of light cells, and from this ring of dark cells emanate clusters of dark cells  
200 penetrating into the outcrops of light cells. This is despite the simplicity of the rules in the model,  
201 including its flattening into 2D. In the simulation, for the first 40-45 time steps, the colony remains small  
202 and predominantly dark, while the resource builds up. Then, dark cells start to switch to light. When this  
203 happens within the bulk of the colony, these light cells have restricted division due to spatial constraints.  
204 Around 100 to 150 time steps later, light cells emerge at the perimeter of the colony, and then rapidly  
205 divide and expand (Figure 3D, Video S1). In order to test if the processes of Figure 3A are all required for  
206 this behavior, we examined three comprehensive control scenarios: (i) dark cells do not produce a  
207 resource (for growth light cells depend only on amino acids, or other pre-supplied resources), (ii) dark  
208 cells cannot switch to the light state, and (iii) light cells produce a resource that is needed by dark cells  
209 to grow (a straw-man). None of these cases produces the wild-type spatial organization, over a wide  
210 range of parameter values (Figure 3E, Figure S3 and Videos S2-4).

211 Summarizing, this simple model successfully recaptures the general features of the spatial  
212 patterning and organization of real colonies. This includes the overall general architecture, and spatial  
213 organization of light and dark cells. Two simple take-home points emerge from this model. First, the  
214 model requires that dark (gluconeogenic) cells produce a resource that is needed by dark cells to switch  
215 to the light state. Second, a resource produced by the dark cells is required to sustain the light state.  
216 Collectively, in our model, these metabolic constraints are sufficient to determine the overall spatial  
217 organization of metabolically distinct, specialized cells.

218

219 **Trehalose satisfies criteria to be the metabolic resource determining the emergence of light cells.**

220 Does any gluconeogenic metabolite(s) determine the organization of these cells, consistent with these  
221 requirements suggested by experimental and modeled data? Such a metabolite must logically satisfy the  
222 following three criteria. First, this resource should be available in the extracellular environment (i.e.  
223 released by cells), second, cells must selectively take up this resource, and third, the resource should be  
224 metabolized to produce glucose/a glucose-like product capable of fueling a glycolytic and PPP-active  
225 state. Further, if this were a 'controlling resource', preventing the uptake and utilization of the resource  
226 should prevent the emergence and proliferation of only the light cells. To identify such a candidate  
227 metabolite, we considered all outputs of gluconeogenesis: the storage carbohydrates/sugars glycogen  
228 and trehalose, the polysaccharides of the cell wall (chitin, mannans, glycans), and glycoproteins (Figure  
229 4A) (Jules et al., 2008; Kayikci and Nielsen, 2015). The large size of glycogen, chitins, and complex  
230 glycosylated proteins, the lack of known cellular machinery for their uptake, and the difficulty in  
231 efficiently breaking them down make them all unlikely candidates to be the controlling resource.  
232 Contrastingly, trehalose is a small, non-reducing disaccharide composed of two glucose molecules.  
233 Trehalose has been observed in the extracellular environment (Parrou et al., 2005), and has uptake

234 transporters in yeast (Jules et al., 2008; Stambuk et al., 1998). Further it can, when rapidly liquidated to  
235 two glucose molecules, fuel glycolysis and re-entry into the cell division cycle (Laporte et al., 2011; Shi et  
236 al., 2010a; Shi and Tu, 2013). This presented trehalose an excellent putative candidate metabolite that  
237 controlled the emergence of cells in the light state. To test this possibility, we first measured  
238 extracellular trehalose in colonies. Free trehalose was readily detectable in the extracellular  
239 environment of these colonies (Figure 4B). To test if trehalose could be differentially transported into  
240 either light or dark cells, we first estimated amounts of a primary trehalose transporter, Mal11 (Stambuk  
241 et al., 1998) in these cells. Mal11 protein amounts were substantially higher in the light cells compared  
242 to the dark cells (Figure 4C). To unambiguously directly estimate trehalose uptake, we isolated light and  
243 dark cells from a mature colony, and exogenously added <sup>13</sup>C-trehalose. We then measured intracellular  
244 levels of labeled trehalose in these cells (by LC/MS/MS) (Table 2). The light cells rapidly accumulated <sup>13</sup>C-  
245 trehalose (Figure 4D), while the dark cells did not, suggesting robust, preferential uptake of extracellular  
246 trehalose. Finally, we estimated the ability of light and dark cells to break-down and utilize trehalose.  
247 For this, we first measured the expression of the predominant neutral trehalase in yeast (Nth1) (Jules et  
248 al., 2008), in the light and dark cells. Light cells had substantially higher Nth1 amounts than the dark cells  
249 (Figure 4E). We also measured enzymatic activity for Nth1 (*in vitro*, using cell lysates), and found that  
250 the light cells had ~2 fold higher *in vitro* enzymatic activity, compared to the dark cells (Figure 4F).  
251 Collectively, these data suggested that the light cells were uniquely able to preferentially take up more  
252 trehalose, break it down to glucose, to potentially utilize it to sustain a metabolic state with high PPP  
253 activity.

254

255 **Trehalose uptake and utilization determines the existence of light cells.**

256 Since these data suggested that trehalose uptake and utilization would be preferentially high in the light  
257 cells, we directly tested this using a quantitative metabolic flux based approach. To the isolated light and  
258 dark cells,  $^{13}\text{C}$ -trehalose was externally provided, and metabolites extracted from the respective cells.  
259 The intracellular amounts of  $^{13}\text{C}$ -labeled glycolytic and PPP intermediates were subsequently measured  
260 using LC/MS/MS (Figure 5A, Figure S4A, Table 2).  $^{13}\text{C}$ -labeled glucose-6-phosphate (which enters both  
261 glycolysis and the PPP), the glycolytic intermediates glyceraldehyde-3-phosphate and 3-  
262 phosphoglycerate, and the PPP intermediates 6-phosphogluconate, ribulose-5-phosphate and  
263 sedoheptulose-7-phosphate all rapidly accumulated exclusively in the light cells (Figure 5A, Figure S4A).  
264 Since the labeled carbon comes directly from trehalose, these data indicate both the breakdown of  
265 trehalose to glucose, and the subsequent utilization of glucose for these pathways. Thus, external  
266 trehalose is preferentially taken up by the light cells, and utilized to fuel the complimentary metabolic  
267 state of the light cells, with high glycolytic and PPP activity. Finally, we tested if the sharing and  
268 differential utilization of trehalose determined both the emergence and proliferation of light cells. An  
269 explicit prediction is made both in our model and our hypothesis based on these experimental data. This  
270 is: preventing sharing and utilization of trehalose should prevent cells from switching to the light state.  
271 To test this prediction, we generated strains lacking *NTH1* (which cannot liquidate trehalose), and  
272 *MAL11* (which will have reduced trehalose uptake), allowed them to develop into mature colonies, and  
273 compared the amounts of light cells in each. Compared to wild-type colonies, cells lacking the major  
274 trehalose uptake transporter ( $\Delta mal11$ ) formed colonies with very few light cells, and cells lacking  
275 trehalase ( $\Delta nth1$ ) had nearly no detectable light cells in the colonies formed, based on brightfield  
276 observations (Figure 5B). This was more directly observed in colonies of cells with these genetic  
277 backgrounds, using the expression of the fluorescent PPP reporter. Here, almost no PPP reporter activity  
278 was observed in the  $\Delta nth1$  cells (Figure 5D). As controls, we ensured that there were no defects in the  
279 expression of the PPP reporters in cells from these genetic backgrounds. Also note: while Mal11 shows a

280 high affinity for trehalose, *S. cerevisiae* has other sugar transporters with reduced affinity for any  
281 disaccharide. Therefore, cells lacking *MAL11* may take up trehalose with lower efficiency, but these cells  
282 are still capable of breaking down trehalose. Correspondingly, the percentage of dark, highly  
283 gluconeogenic cells (as determined using the gluconeogenesis reporter) was proportionately higher in  
284 the  $\Delta mal11$  (~73%), and  $\Delta nth1$  (~80%) colonies compared to the wild-type colony (~65%) (Figure 5C).  
285 Thus, controlling the uptake and utilization of the resource directly regulates the emergence of cells in  
286 the light state. Collectively, these data demonstrate that trehalose is the shared gluconeogenic resource  
287 that determines the emergence and persistence of light cells within the structured colony.

288

#### 289 **A resource threshold effect controls cooperative switching of cells to the light state.**

290 Our experimental data showing the organization of dark and light cells was obtained from ~5-6-  
291 day old, mature colonies. However, in our simulations of the temporal development of the colony, we  
292 observed that the dense network of dark (gluconeogenic) cells form first, followed by a late appearance  
293 of light cells (Figures 6A and Video S1). This late appearance of light cells in the simulations comes from  
294 an inherent threshold effect included within the model, where the external build-up of the shared  
295 resource made by the dark cells is required. At a sufficient built-up concentration, this resource will  
296 trigger the switching of some cells to light cells. Light cells in turn will consume the resource, reducing  
297 the available amounts, thereby preventing other cells from switching to this new state. This threshold-  
298 effect therefore predicts a delayed, rapid emergence of light cells. If this threshold requirement is  
299 removed in the simulation (replaced by a rate of switching from dark to light that depends linearly on  
300 the amount of resource), the resultant colony remains small, and the organized pattern of cells in two  
301 states does not occur. This small colony size is largely due to low resource amounts to support the  
302 proliferation of the light cells, since there are insufficient dark cells remaining to produce the resource

303 (Figures 6A, S5B, S5C, S5D and Video S5). In the model, the externally available amount of the resource  
304 builds-up, reaches the threshold (where cells switch to the light state), and then rapidly decreases, if the  
305 light cells also consume the resource (Figure 6B, upper panel). We therefore experimentally tested these  
306 model predictions, and first estimated the amounts of extracellular, free trehalose in the colony over  
307 time. Notably, trehalose amounts steadily increased over 4 days, and subsequently rapidly decreased  
308 (Figure 6B, lower panel). We next monitored the development of colonies over time, to determine when  
309 light cells emerge. Using just the bright-field image reconstruction of the colonies, during this time  
310 course, the intensity of dark cells steadily increased, and organized into the mesh-like network over 4  
311 days (Figure 6C). However, the light cells appeared only after  $\sim 4$  days, and rapidly increased in number  
312 (Figure 6C). We more quantitatively estimated this, using strains expressing the gluconeogenic- or the  
313 PPP-reporter (Figure 6D). Notably, the increase in total fluorescence intensity due to the gluconeogenic-  
314 reporter in the colony (over time) was very linear over the first four days ( $r^2=0.99$ ). Contrastingly, the  
315 increase in the PPP reporter activity over the first five days was clearly non-linear, with very low signal  
316 intensity for the first three days, and then a rapid emergence of signal over days four and five (Figure  
317 6E). This indicated a cooperative, switch like emergence of, and increase in these light cells. A useful  
318 biophysical measure of cooperativity (more commonly used for protein-ligand binding characteristics) is  
319 the Hill coefficient. We adopted the Hill equation, using the amount of PPP reporter fluorescence  
320 (instead of ligand-receptor binding), to estimate cooperativity in the system. Over the first five days the  
321 increase in PPP-reporter activity showed a Hill coefficient greater than 1, indicating a positively  
322 cooperative switch of cells to the light state (Figure 6E). This correlates perfectly with the build-up and  
323 rapid decrease in external trehalose (Figure 6B). In summary, data from model simulations and  
324 experiments show that initially the gluconeogenic cells increase in number, leading to release and build  
325 up the resource (trehalose) in the local environment. At a threshold concentration of trehalose, some

326 cells switch to light state with high PPP activity. The further expansion of these light cells correlates with  
327 rapid consumption of the extracellular trehalose that sustains this state.

328

329

330 **Discussion:**

331 Collectively, we illustrate a simple schematic proposing how cells in phenotypically and  
332 metabolically distinct states spontaneously emerge and self-organize within a yeast colony. In low  
333 glucose conditions, cells begin in a uniform gluconeogenic state, which is the expected metabolic state  
334 in this nutrient condition. The gluconeogenic cells produce a resource (trehalose) that is externally  
335 available, and builds up to a threshold amount. At this threshold, if a cell takes up and consumes  
336 trehalose, this cell spontaneously switch to the complimentary metabolic state with high glycolytic and  
337 PPP activity (the light state) (Figure 7). Light cells remain in this metabolic state only as long as the  
338 resource (trehalose) is externally available. However, as trehalose is consumed by these cells, the  
339 available amount of external trehalose drops below the threshold, and the surrounding dark cells  
340 remain trapped in a gluconeogenic state, continuing to produce trehalose. A predictable fraction of cells,  
341 constrained spatially, will therefore remain in each metabolic state, resulting in specialized cell groups  
342 and division of metabolic labor. Thus, biochemically heterogeneous cell states can spontaneously  
343 emerge and spatially self-organize.

344 Our study substantially advances descriptions of yeast ‘multicellularity’ from simple dimorphism,  
345 aggregated cells, or three-dimensional colony forms (Cáp et al., 2012; Koschwanez et al., 2011; Palková  
346 and Váchová, 2016; Ratcliff et al., 2012; Váchová and Palková, 2018; Veelders et al., 2010; Wloch-  
347 Salamon et al., 2017), to self-organized, phenotypically heterogeneous cell states exhibiting division of  
348 labor and metabolic interdependence. Strikingly, the nature of spatial patterning allied with division of  
349 labor that we observe in yeast is reminiscent of true multicellular systems (Newman, 2016; Niklas,  
350 2014). Also, the cell states in these yeast colonies can be considered commensal, since trehalose is a  
351 necessary output of gluconeogenesis, and therefore a default, biochemically non-limiting output in dark  
352 cells. Since trehalose controls the emergence and maintenance of light cells in the complimentary  
353 metabolic state, it thus can be considered a resource benefiting the light state. Thus simple,



354 metabolism-derived constraints are sufficient to determine how contrary biochemical states can  
355 spontaneously emerge and be supported, in conjunction with spatial structure. Such organization of  
356 cells into specialized, labor-divided communities expands on the role of reaction-diffusion systems  
357 (particularly activator-depleted substrate schemes) in controlling cellular patterning (Gierer and  
358 Meinhardt, 1972; Kondo and Miura, 2010; Newman, 2016), with a metabolic resource threshold being  
359 central to the emergence and stabilization of a new phenotype (Cai and Tu, 2011; Krishna and Laxman,  
360 2018). A deeper dissection of what such constraints can permit will therefore advance our general  
361 understanding of how specialized cell states can emerge and be stabilized.

362           Metabolic cross-feeding is better understood in multi-species microbial communities, where  
363 this has been inferred largely using inter-species genomic comparisons (Ackermann, 2015; D'Souza et  
364 al., 2018; Goldford et al., 2018; Tyson et al., 2004). Further, metabolic sharing has typically been  
365 demonstrated using synthetically engineered systems where dependencies are created (Campbell et al.,  
366 2016; D'Souza et al., 2018; Mee et al., 2014; Pande et al., 2015; Wintermute and Silver, 2010). The  
367 spatial organizations of any such populations remain challenging to model. Biochemically identifying  
368 metabolites that are conclusively exchanged between cooperating cells remains difficult, and the  
369 significance of such putative metabolite exchange challenging to interpret (Ackermann, 2015; D'Souza et  
370 al., 2018). Finally, such studies have emphasized non-isogenic systems, where genetic changes stabilize  
371 different phenotypes, and auxotrophies define the nutrient sharing or cooperation (Ackermann, 2015).  
372 Contrastingly, here we directly identify a produced metabolic resource, and demonstrate how its  
373 availability and differential utilization can control the emergence of cells in opposing metabolic states, in  
374 a clonal population. This also explains the spontaneous spatial organization into phenotypically distinct  
375 cell groups. Thus, our study also goes beyond stochastic gene expression (Ackermann, 2015; Balázsi et  
376 al., 2011; Blake et al., 2003) to explain how phenotypic heterogeneity and specialization can emerge in  
377 clonal populations. By considering these metabolism-derived rules, and thereby manipulating available

378 metabolic resources, it may be viable to program the formation, structure or phenotypic composition of  
379 isogenic cell populations. Collectively, such simple physico-chemical constraints can advance our  
380 understanding of how isogenic cells can self-organize into specialized, labor-divided groups, as a first  
381 step towards multicellularity.

382

383 **Experimental Procedures:**

384 Yeast strains and growth media:

385 The prototrophic sigma 1278b strain (referred to as wild-type or WT) was used in all experiments.

386 Strains with gene deletions or chromosomally tagged proteins (at the C-terminus) were generated as  
387 described (Longtine et al., 1998). Strains used in this study are listed in Table 1. The growth medium  
388 used in this study is rich medium (1% yeast extract, 2% peptone and 2% glucose or 0.1% glucose).

389 Colony spotting assay:

390 All strains were grown overnight at 30°C in either rich medium or minimal medium. 5 microliters of the  
391 overnight cultures were spotted on rich medium (low glucose) (1% yeast extract, 2% peptone, 0.1%  
392 glucose and 2% agar). Plates were incubated at 30°C for 7 days unless mentioned otherwise.

393 Colony imaging:

394 For observing colony morphology, colonies were imaged using SZX-16 stereo microscope (Olympus)  
395 wherein the light source was above the colony. Bright-field imaging of 7-day old colonies were done  
396 using SZX-16 stereo microscope (Olympus) wherein the light source was below the colony.

397 Epifluorescence microscopy imaging of 7-day old gluconeogenesis reporter colonies (pPCK1-mCherry),  
398 pentose phosphate pathway (PPP) reporter colonies (pTKL1-mCherry) and *HXK1* reporter colonies  
399 (pHXK1-mCherry) were imaged using the red filter (excitation of 587 nm, emission of 610 nm) of SZX-16  
400 stereo microscope (Olympus). Similar protocol was followed for imaging 1-day to 6-day old colonies.

401 Analysis of fluorescent cell populations in reporter strain colonies:

402 Light cells and dark cells isolated from 7-day old wild-type colonies harboring either the gluconeogenesis  
403 reporter, PPP reporter or the *HXK1* reporter were re-suspended in 1 ml of water. The percentage of  
404 fluorescent cells were determined by running the samples through a flow cytometer, and counting the

405 total number of mCherry positive cells in a total of 1 million cells. Light cells and dark cells isolated from  
406 wild-type colonies without the fluorescent reporter were used as control.

407 Biochemical estimation of trehalose/glycogen levels:

408 Trehalose and glycogen from yeast samples were quantified as described previously, with minor  
409 modifications (Shi et al., 2010b). 10 OD<sub>600</sub> of light cells and dark cells from 7-day old wild-type colonies  
410 (rich medium, 0.1% glucose) were collected. After re-suspension in water, 0.5 ml of cell suspension was  
411 transferred to 4 tubes (2 tubes for glycogen assay and the other 2 tubes for trehalose assay). When  
412 sample collections were complete, cell samples (in 0.25 M sodium carbonate) were boiled at 95–98°C  
413 for 4 hr, and then 0.15 ml of 1 M acetic acid and 0.6 ml of 0.2 M sodium acetate were added into each  
414 sample. Each sample was incubated overnight with 1 U/ml amyloglucosidase (Sigma-Aldrich) rotating at  
415 57°C for the glycogen assay, or 0.025 U/ml trehalase (Sigma-Aldrich) at 37°C for the trehalose assay.  
416 Samples were then assayed for glucose using a glucose assay kit (Sigma-Aldrich). Glucose assays were  
417 done using a 96-well plate format. Samples were added into each well with appropriate dilution within  
418 the dynamic range of the assay (20–80 µg/ml glucose). The total volume of sample (with or without  
419 dilution) in each well was 40 microliters. The plate was pre-incubated at 37°C for 5 min, and then 80 µl  
420 of the assay reagent from the kit was added into each well to start the colorimetric reaction. After  
421 30 min of incubation at 37°C, 80 microliters of 12 N sulfuric acid was added to stop the reaction.  
422 Absorbance at 540 nm was determined to assess the quantity of glucose liberated from either glycogen  
423 or trehalose. For measurement of extracellular trehalose measurement, single wild-type colony (1-day  
424 to 7-day old colony) was re-suspended in 100 microliters of water and centrifuged at 20000g for 5 min.  
425 Supernatant was collected and buffered to a pH of 5.4 (optimal for trehalase activity) using sodium  
426 acetate buffer (pH 5.0). 0.025 U/ml trehalase (Sigma-Aldrich) was added and samples were incubated at  
427 37°C overnight. Glucose concentration was estimated as described earlier.

428 Neutral trehalase activity assay:

429 Neutral trehalase activity assay was performed as described earlier with the following modifications (De  
430 Virgilio et al., 1991). Briefly, 1 OD<sub>600</sub> of light cells and dark cells isolated from 7-day old wild-type  
431 colonies (rich medium, 0.1% glucose) were washed twice with ice-cold water. For permeabilization, cells  
432 were re-suspended in tubes containing equal volume of 1% Triton-X in assay buffer (200mM tricine  
433 buffer (Na<sup>+</sup>) (pH 7.0)) and immediately frozen in liquid nitrogen. After thawing (1-4 min at 30°C), the  
434 cells were centrifuged (2 min at 12000g), washed twice with 1ml of ice-cold assay buffer and  
435 immediately used for the trehalase assay. Trehalase assay was performed in 50mM tricine buffer (Na<sup>+</sup>)  
436 (pH 7.0), 0.1 M trehalose, 2mM manganese chloride (MnCl<sub>2</sub>) and the Triton X-100 permeabilized cells in  
437 a total volume of 400 microliters. After incubation for 30 min at 30°C, the reaction was stopped in a  
438 boiling water bath for 3 min. Glucose concentration in the supernatant was determined using the  
439 glucose assay kit (Sigma-Aldrich).

440 Western blot analysis:

441 Approximately ten OD<sub>600</sub> cells were collected from respective cultures, pelleted and flash frozen in liquid  
442 nitrogen until further use. The cells were re-suspended in 400 microliters of 10% trichloroacetic acid  
443 (TCA) and lysed by bead-beating three times: 30 sec of beating and then 1 min of cooling on ice. The  
444 precipitates were collected by centrifugation, re-suspended in 400 microliters of SDS-glycerol buffer  
445 (7.3% SDS, 29.1% glycerol and 83.3 mM tris base) and heated at 100°C for 10 min. The supernatant after  
446 centrifugation was treated as the crude extract. Protein concentrations from extracts were estimated  
447 using bicinchoninic acid assay (Thermo Scientific). Equal amounts of samples were resolved on 4 to 12%  
448 bis-tris gels (Invitrogen). Western blots were developed using the antibodies against the respective tags.  
449 We used the following primary antibody: 538 monoclonal FLAG M2 (Sigma-Aldrich). Horseradish

450 peroxidase–conjugated secondary antibody (anti-mouse) was obtained from Sigma-Aldrich. For Western  
451 blotting, standard enhanced chemiluminescence reagents (GE Healthcare) were used.

452 Metabolite extractions and measurements by LC-MS/MS:

453 Light cells and dark cells isolated from wild-type colonies grown in different media were rapidly  
454 harvested and metabolites were extracted as described earlier (Walvekar et al., 2018). Metabolites were  
455 measured using LC-MS/MS method as described earlier (Walvekar et al., 2018). Standards were used for  
456 developing multiple reaction monitoring (MRM) methods on Sciex QTRAP 6500. Metabolites were  
457 separated using a Synergi 4 $\mu$  Fusion-RP 80A column (100  $\times$  4.6 mm, Phenomenex) on Agilent’s 1290  
458 infinity series UHPLC system coupled to the mass spectrometer. For positive polarity mode, buffers used  
459 for separation were- buffer A: 99.9% H<sub>2</sub>O/0.1% formic acid and buffer B: 99.9% methanol/0.1% formic  
460 acid (Column temperature, 40°C; Flow rate, 0.4 ml/min; T = 0 min, 0% B; T = 3 min, 5% B; T = 10 min,  
461 60% B; T = 11 min, 95% B; T = 14 min, 95% B; T = 15 min, 5% B; T = 16 min, 0% B; T = 21 min, stop). For  
462 negative polarity mode, buffers used for separation were- buffer A: 5 mM ammonium acetate in H<sub>2</sub>O  
463 and buffer B: 100% acetonitrile (Column temperature, 25°C; Flow rate: 0.4 ml/min; T = 0 min, 0% B; T = 3  
464 min, 5% B; T = 10 min, 60% B; T = 11 min, 95% B; T = 14 min, 95% B; T = 15 min, 5% B; T = 16 min, 0% B; T  
465 = 21 min, stop). The area under each peak was calculated using AB SCIEX MultiQuant software 3.0.1.

466

467 <sup>15</sup>N- and <sup>13</sup>C- based metabolite labelling experiments:

468 For detecting <sup>15</sup>N label incorporation in nucleotides, <sup>15</sup>N Ammonium sulfate (Sigma-Aldrich) and <sup>15</sup>N  
469 Aspartate (Cambridge Isotope Laboratories) with all nitrogens labeled were used. For <sup>13</sup>C-labeling  
470 experiment, <sup>13</sup>C Trehalose with all carbons labeled (Cambridge Isotope Laboratories) was used. All the  
471 parent/product masses measured are enlisted in Table 2. For all the nucleotide measurements, release  
472 of the nitrogen base was monitored in positive polarity mode. For all sugar phosphates, the phosphate

473 release was monitored in negative polarity mode. The HPLC and MS/MS protocol was similar to those  
474 explained above.

475

## 476 **Building and implementing the model:**

477

### 478 Components:

479 The model consists of (i) a population of light and dark cells, and (ii) a shared metabolic resource that is  
480 produced by, and is accessible to the cells. Therefore, the dynamic processes involved can be broadly  
481 divided into those pertaining to the cells of the colony and those pertaining to the shared resource. The  
482 cells and resource occupy a 2-D square grid, which represents the surface of an agar plate. If one takes  
483 each grid length to correspond to 50 $\mu$ m in real space, then, given the average size of a yeast cell at 5 $\mu$ m,  
484 a single grid location can be imagined to contain upto 100 cells, which we term “cell blocks”. We coarse-  
485 grain the model such that each location is either empty, occupied by light cell block, or a dark cell block.  
486 That is, we ignore the possibility that cell blocks might be mixed. This is simply for computational ease. A  
487 more detailed model consisting of smaller grid lengths such that each location could hold at most a  
488 single cell would exhibit the same behavior as the coarse-grained one, but would require much larger  
489 grid sizes and longer computational times in order to simulate realistic sized colonies. With the coarse-  
490 graining, our simulations use a 250 x 250 grid. Each grid location also contains saturating amounts of  
491 amino acids, as well as a certain level of the shared metabolic resource. If a location has a cell block, that  
492 block also has internal levels of the amino acids and the resource, which may be different from the  
493 external level in that location.

### 494 Initial state of the grid:

495 We start with an approximately circular colony 20 grid lengths in radius (covering 1257 grid locations) in  
496 the center of the 250 x 250 grid. 95-99% of these 1257 cell blocks are in the dark state, while 1-5% are in  
497 the light state, distributed randomly in the colony. The concentration or level of the shared resource is  
498 set to zero at every location. However, at all times, we assume the presence, throughout the grid, of  
499 saturating amounts of amino acids that are required for the (slow) growth of the dark cells.

500 Dynamics of the model:

501 The grid is updated at discrete time steps. Each time step corresponds to 12 min in real time, and all  
502 simulations are run for 750 time steps, i.e., 150 hours of real time (~ 6 days). In each time step, we first  
503 go over every cell block to implement the following processes:

504 If a block at location  $(x,y)$  is dark, then:

- 505 1. If the resource level at  $(x,y)$  is above a certain threshold  $S = 3.0$  units of resource, then the cells  
506 in the block switch to being light cells with a probability  $p = 0.5$
- 507 2. If the block is still dark, then add  $R = 0.07$  units to the resource level at  $(x,y)$ .
- 508 3. Consume (internalize)  $C = 0.05$  units of amino acids (present in saturating amounts at all  
509 locations)
- 510 4. If the internal amino acid level is greater than or equal to 1.0, the dark block can divide with a  
511 probability  $g_d = 0.01$ .
- 512 5. If the block can divide, then check if there's an empty location in the immediate  
513 neighborhood. The immediate neighborhood is the set of locations  $\{(x-1,y), (x+1,y), (x,y-1),$   
514  $(x,y+1)\}$ .
- 515 6. If there's at least one empty space, preferably divide into an empty location which has more  
516 occupied neighbors. After division, the two daughter blocks are each assigned half the internal  
517 amino acid reserves of the original mother block.



518

519 If a block at location  $(x,y)$  is light, then :

- 520 1. If the resource level at  $(x,y)$  is greater than or equal to  $C = 0.05$  units, consume (internalize) all of  
521 it.
- 522 2. If the internal resource level is greater than or equal to 1.0, the dark block can divide with a  
523 probability  $g_i = 0.04$ .
- 524 3. If the block can divide, then check if there's an empty location in the immediate  
525 neighborhood. The immediate neighborhood is the set of locations  $\{(x-1,y),(x+1,y),(x,y-$   
526  $1),x,y+1\}$ .
- 527 4. If there's at least one empty space, preferably divide into an empty location that has more  
528 occupied neighbors. After division, the two daughter blocks are each assigned half the internal  
529 resource reserves of the original mother block.

530

531 (The above set of rules and parameters is for simulating the wild-type colony. For the variations  
532 highlighted in the main text (Figure 3E and 6A, bottom row), see the 'Variants of the wild-type model'  
533 section below.)

534 These processes implement growth of cells, as well as production and consumption of amino acids and  
535 the shared metabolic resource. Subsequent to this, in each time step, we allow diffusion of the resource  
536 levels across the grid (the "external" level at the location, not the internal levels in cell blocks), using a  
537 numerical scheme called Forward Time Central Space (FTCS). Say that the value of the resource at time  $t$   
538 and location  $(x,y)$  is given by  $U_{x,y}^t$ . The FTCS scheme updates the value simultaneously at all locations  
539 using the following formula:

$$U_{x,y}^{t+\Delta T} = U_{x,y}^t + D \frac{\Delta T}{\Delta L^2} (U_{x-1,y}^t + U_{x+1,y}^t + U_{x,y-1}^t + U_{x,y+1}^t - 4U_{x,y}^t)$$

540 where  $\Delta T$  is the time step and  $\Delta L$  is the space step, or grid length, and  $D$  is the diffusion constant for the  
541 resource.

542

543 Model parameters:

544 1) The parameters of the model are shown in Table 3. Time and length units are chosen such that each  
545 time step is one unit of time, and each grid length is one unit length. With these choice of units, the  
546 growth parameters for light and dark cells, respectively, are  $g_l = 0.04$ ,  $g_d = 0.01$ . These were chosen so as  
547 to reflect the relative rates of diffusion and division. Light cells were observed to grow faster than the  
548 dark cells, so their respective growth parameters are set accordingly.

549 2) The switching threshold parameter ( $S = 3.0$ ) was chosen to account for a delay in the switching of dark  
550 cells to another metabolic pathway via nutrient sensing as well as to give a reproducible facsimile of the  
551 experimental colonies.

552 3) The shared resource production value was chosen to be 7% ( $R = 0.07$ ) of the minimum required to  
553 divide. In each time step, every block of dark cells adds this amount to the resource grid. This was  
554 chosen as a default value, which gave a reproducible facsimile of the experimental colonies. Other  
555 values were tried and their effect is seen in Figure S4.

556 4) All cells consumed a small level of metabolites (the shared resource or amino acids) in each time step.  
557 This value was chosen to be 5% of the minimum required for division ( $C = 0.05$ ). This gave division times  
558 that approximately matched the division times observed experimentally.

559 5) The switching probability ( $p = 0.5$ ) was chosen to add an element of stochasticity. So even if the  
560 threshold resource conditions are met, dark cells have a 50% chance to switch to light cells in that time  
561 step.

562 6) The choice of the diffusion constant ( $D = 0.24$ ) is limited by the numerical stability of the FTCS  
563 scheme, which allows only a maximum value of  $D = 0.25$ . In real time and length units, this corresponds  
564 to a diffusion constant  $D_{\text{eff}}$  of  $8.7 \times 10^{-13} \text{ m}^2/\text{s}$ .  $D_{\text{eff}}$  is an order of magnitude smaller than the diffusion  
565 constant for sugars like glucose and sucrose in water (57). Since the agar used for the experiments is  
566 mostly water, the diffusion constants in water can be considered as a good reference point.

567

568 Variants of the wild-type model in different figures:

569 Figures 3E, Figure 6 (bottom row) and Figure S5 showcase some of the final colonies generated by the  
570 simulations when the rules described above are varied. The following changes were made to the  
571 rules/parameters to generate these.

572 3E(i): No sharing: Set  $R = 0$ .

573 3E(ii): No switching from dark to light state: Set  $p = 0$ .

574 3E(iii): 'Reverse' sharing: Set  $R = 0$ . When a cell block is light it adds  $R' = 0.07$  to the amino acid grid at  
575 the same location.

576 6(bottom row): No resource thresholding: Set  $S = 0$ .

577 S5: Linear switching: Set  $S = 0$ . The probability of switching from dark to light state,  $p$ , is now a linear  
578 function of the locally available resource with a maximum value of 1.0. That is,  $p = \max(m * U_{x,y}^t, 1.0)$ ,  
579 where  $m$  is a parameter that sets the slope of this linear relationship.



581 **ACKNOWLEDGEMENTS**

582 **Funding:** This work was supported by a Wellcome Trust-DBT India Alliance Intermediate Fellowship  
583 (IA/I/14/2/501523) and institutional support from inStem and DBT to SL, a Wellcome Trust-DBT India  
584 Alliance Early Career Fellowship (IA/E/16/1/502996) to SV, institutional support from inStem and the  
585 Department of Biotechnology to SL, institutional support from NCBS-TIFR and the Simons Foundation to  
586 VS and SK. The authors thank Vidyanand Nanjundiah, Ramray Bhat and Andras Paldi for insightful  
587 comments on this manuscript. **Author contributions:** SV designed and performed experiments, analyzed  
588 and interpreted data, and contributed to writing the paper. AW designed and performed experiments,  
589 analyzed and interpreted data. VS designed and implemented the mathematical model, carried out  
590 simulations, and contributed to writing the paper. SK designed the mathematical model, helped validate  
591 it, and contributed to writing the paper. SL conceived the project, designed experiments, analyzed and  
592 interpreted data, supervised the project and wrote the paper. **Competing interests:** No competing  
593 interests declared. **Data and materials availability:** all strains used in this study are available on request.  
594 The model simulation code is available via GitHub ref: <https://github.com/vaibhhav/yeastmetabcolony>.

595

596 **References:**

- 597 Ackermann M. 2015. A functional perspective on phenotypic heterogeneity in microorganisms. *Nat Rev*  
598 *Microbiol* **13**:497–508. doi:10.1038/nrmicro3491
- 599 Balázsi G, van Oudenaarden A, Collins JJ. 2011. Cellular decision making and biological noise: from  
600 microbes to mammals. *Cell* **144**:910–25. doi:10.1016/j.cell.2011.01.030
- 601 Blake WJ, KAern M, Cantor CR, Collins JJ. 2003. Noise in eukaryotic gene expression. *Nature* **422**:633–7.  
602 doi:10.1038/nature01546
- 603 Bonner JT. 1949. The social amoebae. *Sci Am*.
- 604 Broach JR. 2012. Nutritional control of growth and development in yeast. *Genetics* **192**:73–105.  
605 doi:10.1534/genetics.111.135731
- 606 Cai L, Tu BP. 2011. Acetyl-CoA drives the transcriptional growth program in yeast. *Cell Cycle* **10**:3045–6.  
607 doi:10.4161/cc.10.18.17000
- 608 Campbell K, Vowinckel J, Müllleder M, Malmshaimer S, Lawrence N, Calvani E, Miller-Fleming L, Alam  
609 MT, Christen S, Keller MA, Ralser M. 2015. Self-establishing communities enable cooperative  
610 metabolite exchange in a eukaryote. *Elife* **4**. doi:10.7554/eLife.09943
- 611 Campbell K, Vowinckel J, Ralser M. 2016. Cell-to-cell heterogeneity emerges as consequence of  
612 metabolic cooperation in a synthetic yeast community. *Biotechnol J* **11**:1169–1178.  
613 doi:10.1002/biot.201500301
- 614 Cáp M, Stěpánek L, Harant K, Váchová L, Palková Z. 2012. Cell Differentiation within a Yeast Colony:  
615 Metabolic and Regulatory Parallels with a Tumor-Affected Organism. *Mol Cell* **46**:436–48.  
616 doi:10.1016/j.molcel.2012.04.001

- 617 Crabtree HG. 1929. Observations on the carbohydrate metabolism of tumours. *Biochem J* **23**:536–45.
- 618 D’Souza G, Shitut S, Preussger D, Yousif G, Waschina S, Kost C. 2018. Ecology and evolution of metabolic  
619 cross-feeding interactions in bacteria. *Nat Prod Rep* **35**:455–488. doi:10.1039/c8np00009c
- 620 De Deken RH. 1966. The Crabtree effect: a regulatory system in yeast. *J Gen Microbiol* **44**:149–56.  
621 doi:10.1099/00221287-44-2-149
- 622 De Virgilio C, Bürckert N, Boller T, Wiemken A. 1991. A method to study the rapid phosphorylation-  
623 related modulation of neutral trehalase activity by temperature shifts in yeast. *FEBS Lett* **291**:355–  
624 8.
- 625 Du Q, Kawabe Y, Schilde C, Chen Z-H, Schaap P. 2015. The Evolution of Aggregative Multicellularity and  
626 Cell-Cell Communication in the Dictyostelia. *J Mol Biol* **427**:3722–33.  
627 doi:10.1016/j.jmb.2015.08.008
- 628 Embree M, Liu JK, Al-Bassam MM, Zengler K. 2015. Networks of energetic and metabolic interactions  
629 define dynamics in microbial communities. *Proc Natl Acad Sci U S A* **112**:15450–5.  
630 doi:10.1073/pnas.1506034112
- 631 François J, Neves MJ, Hers HG. n.d. The control of trehalose biosynthesis in *Saccharomyces cerevisiae*:  
632 evidence for a catabolite inactivation and repression of trehalose-6-phosphate synthase and  
633 trehalose-6-phosphate phosphatase. *Yeast* **7**:575–87. doi:10.1002/yea.320070605
- 634 Gierer A, Meinhardt H. 1972. A theory of biological pattern formation. *Kybernetik*.  
635 doi:10.1007/BF00289234
- 636 Goldford JE, Lu N, Bajić D, Estrela S, Tikhonov M, Sanchez-Gorostiaga A, Segrè D, Mehta P, Sanchez A.  
637 2018. Emergent simplicity in microbial community assembly. *Science* **361**:469–474.  
638 doi:10.1126/science.aat1168

- 639 Granek JA, Magwene PM. 2010. Environmental and Genetic Determinants of Colony Morphology in  
640 Yeast. *PLoS Genet* **6**:e1000823. doi:10.1371/journal.pgen.1000823
- 641 Haarasilta S, Oura E. 1975. On the activity and regulation of anaplerotic and gluconeogenic enzymes  
642 during the growth process of baker's yeast. The biphasic growth. *Eur J Biochem* **52**:1–7.
- 643 Halfmann R, Jarosz DF, Jones SK, Chang A, Lancaster AK, Lindquist S. 2012. Prions are a common  
644 mechanism for phenotypic inheritance in wild yeasts. *Nature* **482**:363–8. doi:10.1038/nature10875
- 645 Halme A, Bumgarner S, Styles C, Fink GR. 2004. Genetic and epigenetic regulation of the FLO gene family  
646 generates cell-surface variation in yeast. *Cell* **116**:405–15.
- 647 Johnson DR, Goldschmidt F, Lilja EE, Ackermann M. 2012. Metabolic specialization and the assembly of  
648 microbial communities **6**:1985–1991. doi:10.1038/ismej.2012.46
- 649 Jules M, Beltran G, François J, Parrou JL. 2008. New insights into trehalose metabolism by  
650 *Saccharomyces cerevisiae*: NTH2 encodes a functional cytosolic trehalase, and deletion of TPS1  
651 reveals Ath1p-dependent trehalose mobilization. *Appl Environ Microbiol* **74**:605–14.  
652 doi:10.1128/AEM.00557-07
- 653 Kaiser D. 1986. Control of multicellular development: Dictyostelium and Myxococcus. *Annu Rev Genet*  
654 **20**:539–66. doi:10.1146/annurev.ge.20.120186.002543
- 655 Kayikci Ö, Nielsen J. 2015. Glucose repression in *Saccharomyces cerevisiae*. *FEMS Yeast Res* **15**.  
656 doi:10.1093/femsyr/fov068
- 657 Kearns DB, Chu F, Rudner R, Losick R. 2004. Genes governing swarming in *Bacillus subtilis* and evidence  
658 for a phase variation mechanism controlling surface motility. *Mol Microbiol* **52**:357–69.  
659 doi:10.1111/j.1365-2958.2004.03996.x



- 660 Kolter R. 2007. Biology of microbial communities--interview. *J Vis Exp* 205. doi:10.3791/205
- 661 Kondo S, Miura T. 2010. Reaction-diffusion model as a framework for understanding biological pattern  
662 formation. *Science* **329**:1616–20. doi:10.1126/science.1179047
- 663 Koschwanez JH, Foster KR, Murray AW. 2011. Sucrose utilization in budding yeast as a model for the  
664 origin of undifferentiated multicellularity. *PLoS Biol* **9**:e1001122. doi:10.1371/journal.pbio.1001122
- 665 Krishna S, Laxman S. 2018. A minimal “push-pull” bistability model explains oscillations between  
666 quiescent and proliferative cell states. *Mol Biol Cell* mbc.E18-01-0017. doi:10.1091/mbc.E18-01-  
667 0017
- 668 Laporte D, Lebaudy A, Sahin A, Pinson B, Ceschin J, Daignan-Fornier B, Sagot I. 2011. Metabolic status  
669 rather than cell cycle signals control quiescence entry and exit. *J Cell Biol* **192**:949–57.  
670 doi:10.1083/jcb.201009028
- 671 Liu J, Prindle A, Humphries J, Gabalda-Sagarra M, Asally M, Lee DD, Ly S, Garcia-Ojalvo J, Süel GM. 2015.  
672 Metabolic co-dependence gives rise to collective oscillations within biofilms. *Nature* **523**:550–554.  
673 doi:10.1038/nature14660
- 674 Lobo Z, Maitra PK. 1977. Genetics of yeast hexokinase. *Genetics* **86**:727–44.
- 675 Longtine MS, McKenzie A, Demarini DJ, Shah NG, Wach A, Brachat A, Philippsen P, Pringle JR. 1998.  
676 Additional modules for versatile and economical PCR-based gene deletion and modification in  
677 *Saccharomyces cerevisiae*. *Yeast* **14**:953–61. doi:10.1002/(SICI)1097-0061(199807)14:10<953::AID-  
678 YEA293>3.0.CO;2-U
- 679 Mee MT, Collins JJ, Church GM, Wang HH. 2014. Syntrophic exchange in synthetic microbial  
680 communities. *Proc Natl Acad Sci U S A* **111**:E2149-56. doi:10.1073/pnas.1405641111

- 681 Nelson DL, Cox MM. 2013. *Lehninger Principles of Biochemistry.*, Seven. ed, Lehninger Principles of  
682 Biochemistry. Macmillan.
- 683 Newman SA. 2016. 'Biogeneric' developmental processes: drivers of major transitions in animal  
684 evolution. *Philos Trans R Soc B Biol Sci* **371**:20150443. doi:10.1098/rstb.2015.0443
- 685 Niklas KJ. 2014. The evolutionary-developmental origins of multicellularity. *Am J Bot* **101**:6–25.  
686 doi:10.3732/ajb.1300314
- 687 Octavio LM, Gedeon K, Maheshri N. 2009. Epigenetic and conventional regulation is distributed among  
688 activators of FLO11 allowing tuning of population-level heterogeneity in its expression. *PLoS Genet*  
689 **5**:e1000673. doi:10.1371/journal.pgen.1000673
- 690 Palková Z, Váchová L. 2016. Yeast cell differentiation: Lessons from pathogenic and non-pathogenic  
691 yeasts. *Semin Cell Dev Biol* **57**:110–119. doi:10.1016/j.semcdb.2016.04.006
- 692 Pande S, Shitut S, Freund L, Westermann M, Bertels F, Colesie C, Bischofs IB, Kost C. 2015. Metabolic  
693 cross-feeding via intercellular nanotubes among bacteria. *Nat Commun* **6**:6238.  
694 doi:10.1038/ncomms7238
- 695 Parrou JL, Jules M, Beltran G, François J. 2005. Acid trehalase in yeasts and filamentous fungi:  
696 localization, regulation and physiological function. *FEMS Yeast Res* **5**:503–11.  
697 doi:10.1016/j.femsyr.2005.01.002
- 698 Ratcliff WC, Denison RF, Borrello M, Travisano M. 2012. Experimental evolution of multicellularity. *Proc*  
699 *Natl Acad Sci U S A* **109**:1595–600. doi:10.1073/pnas.1115323109
- 700 Reynolds TB, Fink GR. 2001. Bakers' yeast, a model for fungal biofilm formation. *Science* **291**:878–81.  
701 doi:10.1126/science.291.5505.878

- 702 Roache PJ. 1972. Computational Fluid Dynamics (1st ed.). Hermosa. ISBN 0-913478.
- 703 Rodríguez A, De La Cera T, Herrero P, Moreno F. 2001. The hexokinase 2 protein regulates the  
704 expression of the GLK1, HXK1 and HXK2 genes of *Saccharomyces cerevisiae*. *Biochem J* **355**:625–31.
- 705 Shi L, Sutter BM, Ye X, Tu BP. 2010a. Trehalose is a key determinant of the quiescent metabolic state  
706 that fuels cell cycle progression upon return to growth. *Mol Biol Cell* **21**:1982–90.
- 707 Shi L, Sutter BM, Ye X, Tu BP. 2010b. Trehalose is a key determinant of the quiescent metabolic state  
708 that fuels cell cycle progression upon return to growth. *Mol Biol Cell* **21**:1982–90.  
709 doi:10.1091/mbc.e10-01-0056
- 710 Shi L, Tu BP. 2013. Acetyl-CoA induces transcription of the key G1 cyclin CLN3 to promote entry into the  
711 cell division cycle in *Saccharomyces cerevisiae*. *Proc Natl Acad Sci* **110**:7318–7323.
- 712 Sneppen K, Semsey S, Seshasayee ASN, Krishna S. 2015. Restriction modification systems as engines of  
713 diversity. *Front Microbiol* **6**:528. doi:10.3389/fmicb.2015.00528
- 714 Spudich JL, Koshland DE. 1976. Non-genetic individuality: chance in the single cell. *Nature* **262**:467–71.
- 715 Stambuk BU, Panek AD, Crowe JH, Crowe LM, de Araujo PS. 1998. Expression of high-affinity trehalose-  
716 H<sup>+</sup> symport in *Saccharomyces cerevisiae*. *Biochim Biophys Acta* **1379**:118–28.
- 717 Tyson GW, Chapman J, Hugenholtz P, Allen EE, Ram RJ, Richardson PM, Solovyev V V, Rubin EM, Rokhsar  
718 DS, Banfield JF. 2004. Community structure and metabolism through reconstruction of microbial  
719 genomes from the environment **428**:37–43.
- 720 Váchová L, Palková Z. 2018. How structured yeast multicellular communities live, age and die? *FEMS*  
721 *Yeast Res* **18**. doi:10.1093/femsyr/foy033
- 722 Veelders M, Brückner S, Ott D, Unverzagt C, Mösch H-U, Essen L-O. 2010. Structural basis of flocculin-

- 723 mediated social behavior in yeast. *Proc Natl Acad Sci U S A* **107**:22511–6.
- 724 doi:10.1073/pnas.1013210108
- 725 Walfridsson M, Hallborn J, Penttilä M, Keränen S, Hahn-Hägerdal B. 1995. Xylose-metabolizing
- 726 *Saccharomyces cerevisiae* strains overexpressing the TKL1 and TAL1 genes encoding the pentose
- 727 phosphate pathway enzymes transketolase and transaldolase. *Appl Environ Microbiol* **61**:4184–90.
- 728 Walvekar A, Rashida Z, Maddali H, Laxman S. 2018. A versatile LC-MS/MS approach for comprehensive,
- 729 quantitative analysis of central metabolic pathways. *Wellcome open Res* **3**:122.
- 730 doi:10.12688/wellcomeopenres.14832.1
- 731 Wintermute EH, Silver PA. 2010. Emergent cooperation in microbial metabolism. *Mol Syst Biol* **6**:1–7.
- 732 doi:10.1038/msb.2010.66
- 733 Wloch-Salamon DM, Fisher RM, Regenber B. 2017. Division of labour in the yeast: *Saccharomyces*
- 734 *cerevisiae*. *Yeast* **34**:399–406. doi:10.1002/yea.3241
- 735 Yin Z, Hatton L, Brown AJ. 2000. Differential post-transcriptional regulation of yeast mRNAs in response
- 736 to high and low glucose concentrations. *Mol Microbiol* **35**:553–65.
- 737
- 738

739 **Table 1.** Strains and plasmids used in this study.

740

| Strain/genotype                                 | Information                                                                                                         | Source/reference            |
|-------------------------------------------------|---------------------------------------------------------------------------------------------------------------------|-----------------------------|
| <b>Wild-type (WT)</b>                           | YBC16G1, prototrophic sigma1278b, <i>MAT a</i>                                                                      | Isolate <i>via</i> Fink Lab |
| <b>WT (pPCK1-mCherry)</b>                       | <i>Wild-type strain with gluconeogenesis reporter plasmid (mCherry with PCK1 promoter)</i>                          | this study                  |
| <b>WT (pHXK1-mCherry)</b>                       | <i>Wild-type strain with constitutive reporter plasmid (mCherry with HXK1 promoter)</i>                             | this study                  |
| <b>WT (pTKL1-mCherry)</b>                       | <i>Wild-type strain with pentose phosphate pathway reporter plasmid (mCherry with TKL1 promoter)</i>                | this study                  |
| <b>PCK1-flag</b>                                | <i>MAT a PCK1-3xFLAG::natNT2</i>                                                                                    | this study                  |
| <b>FBP1-flag</b>                                | <i>MAT a FBP1-3xFLAG::natNT2</i>                                                                                    | this study                  |
| <b>ICL1-flag</b>                                | <i>MAT a ICL1-3xFLAG::natNT2</i>                                                                                    | this study                  |
| <b>MAL11-flag</b>                               | <i>MAT a MAL11-3xFLAG::natNT2</i>                                                                                   | this study                  |
| <b>NTH1-flag</b>                                | <i>MAT a NTH1-3xFLAG::natNT2</i>                                                                                    | this study                  |
| <b><math>\Delta</math>nth1</b>                  | <i>MAT a nth1::kanMX6</i>                                                                                           | this study                  |
| <b><math>\Delta</math>mal11</b>                 | <i>MAT a mal11::kanMX6</i>                                                                                          | this study                  |
| <b><math>\Delta</math>nth1 (pPCK1-mCherry)</b>  | <i><math>\Delta</math>nth1 strain with gluconeogenesis reporter plasmid (mCherry with PCK1 promoter)</i>            | this study                  |
| <b><math>\Delta</math>mal11 (pPCK1-mCherry)</b> | <i><math>\Delta</math>mal11 strain with gluconeogenesis reporter plasmid (mCherry with PCK1 promoter)</i>           | this study                  |
| <b><math>\Delta</math>nth1 (pTKL1-mCherry)</b>  | <i><math>\Delta</math>nth1 strain with pentose phosphate pathway reporter plasmid (mCherry with TKL1 promoter)</i>  | this study                  |
| <b><math>\Delta</math>mal11 (pTKL1-mCherry)</b> | <i><math>\Delta</math>mal11 strain with pentose phosphate pathway reporter plasmid (mCherry with TKL1 promoter)</i> | this study                  |
| Plasmid                                         | Information                                                                                                         | Source/reference            |
| <b>pPCK1-mCherry</b>                            | <i>mCherry under the PCK1 promoter and CYC1 terminator. p417 centromeric plasmid backbone, G418<sup>R</sup>.</i>    | this study                  |
| <b>pHXK1-mCherry</b>                            | <i>mCherry under the HXK1 promoter and CYC1 terminator. p417 centromeric plasmid backbone, G418<sup>R</sup>.</i>    | this study                  |

**pTKL1-mCherry**

*mCherry under the TKL1 promoter and CYC1 terminator. p417 centromeric plasmid backbone, G418<sup>R</sup>.* this study

741

742 **Table 2.** Mass transitions used for LC-MS/MS experiments.

| <b>Nucleotides</b>                    | <b>Formula</b>        | <b>Parent/Product<br/>(positive polarity)</b> | <b>Comment (for 15N experiment)</b>      |
|---------------------------------------|-----------------------|-----------------------------------------------|------------------------------------------|
| <b>AMP</b>                            | $C_{10}H_{14}N_5O_7P$ | 348/136                                       | Product has all N                        |
| <b>15N_AMP_1</b>                      |                       | 349/137                                       |                                          |
| <b>15N_AMP_2</b>                      |                       | 350/138                                       |                                          |
| <b>15N_AMP_3</b>                      |                       | 351/139                                       |                                          |
| <b>15N_AMP_4</b>                      |                       | 352/140                                       |                                          |
| <b>15N_AMP_5</b>                      |                       | 353/141                                       |                                          |
| <b>GMP</b>                            | $C_{10}H_{14}N_5O_8P$ | 364/152                                       | Product has all N                        |
| <b>15N_GMP_1</b>                      |                       | 365/153                                       |                                          |
| <b>15N_GMP_2</b>                      |                       | 366/154                                       |                                          |
| <b>15N_GMP_3</b>                      |                       | 367/155                                       |                                          |
| <b>15N_GMP_4</b>                      |                       | 368/156                                       |                                          |
| <b>15N_GMP_5</b>                      |                       | 369/157                                       |                                          |
| <b>CMP</b>                            | $C_9H_{14}N_3O_8P$    | 324/112                                       | Product has all N                        |
| <b>15N_CMP_1</b>                      |                       | 325/113                                       |                                          |
| <b>15N_CMP_2</b>                      |                       | 326/114                                       |                                          |
| <b>15N_CMP_3</b>                      |                       | 327/115                                       |                                          |
| <b>UMP</b>                            | $C_9H_{13}N_2O_9P$    | 325/113                                       | Product has all N                        |
| <b>15N_UMP_1</b>                      |                       | 326/114                                       |                                          |
| <b>15N_UMP_2</b>                      |                       | 327/115                                       |                                          |
| <b>Trehalose and sugar phosphates</b> | <b>Formula</b>        | <b>Parent/Product<br/>(negative polarity)</b> | <b>Comment (for 13C experiment)</b>      |
| <b>Trehalose</b>                      | $C_{12}H_{22}O_{11}$  | 341.3/179.3                                   |                                          |
| <b>13C_Trehalose_12</b>               |                       | 353.3/185.3                                   | Product has 6 C all of which are labeled |
| <b>G3P</b>                            | $C_3H_7O_6P$          | 169/97                                        | Monitoring the phosphate release         |
| <b>13C_G3P_3</b>                      |                       | 172/97                                        |                                          |
| <b>3PG</b>                            | $C_3H_7O_7P$          | 185/97                                        | Monitoring the phosphate release         |
| <b>13C_3PG_3</b>                      |                       | 188/97                                        |                                          |
| <b>G6P</b>                            | $C_6H_{13}O_9P$       | 259/97                                        | Monitoring the phosphate release         |
| <b>13C_G6P_6</b>                      |                       | 265/97                                        |                                          |
| <b>6PG</b>                            | $C_6H_{13}O_{10}P$    | 275/97                                        | Monitoring the phosphate release         |
| <b>13C_6PG_6</b>                      |                       | 281/97                                        |                                          |
| <b>R5P</b>                            | $C_5H_{11}O_8P$       | 229/97                                        | Monitoring the phosphate release         |
| <b>13C_R5P_5</b>                      |                       | 234/97                                        |                                          |
| <b>S7P</b>                            | $C_7H_{15}O_{10}P$    | 289/97                                        | Monitoring the phosphate release         |
| <b>13C_S7P_5</b>                      |                       | 294/97                                        |                                          |

743

744 **Table 3.** Parameters of the model for the wild-type case.

| Parameter                                                                  | Notation | Value                  |
|----------------------------------------------------------------------------|----------|------------------------|
| Growth rate (dark cell block)                                              | $g_d$    | 0.01 /T                |
| Growth rate (light cell block)                                             | $g_l$    | 0.04 /T                |
| Switching threshold                                                        | S        | 3.0 units              |
| Resource produced by each dark cell block                                  | R        | 0.07 units/T           |
| Resource or amino acids consumed per cell block (light or dark)            | C        | 0.05 units/T           |
| Minimum resource or amino acid reserve needed for division (light or dark) | --       | 1.0 unit               |
| Chance to switch to light cell if threshold reached                        | P        | 0.5 /T                 |
| Diffusion constant of the resource                                         | D        | 0.24 L <sup>2</sup> /T |

745

746



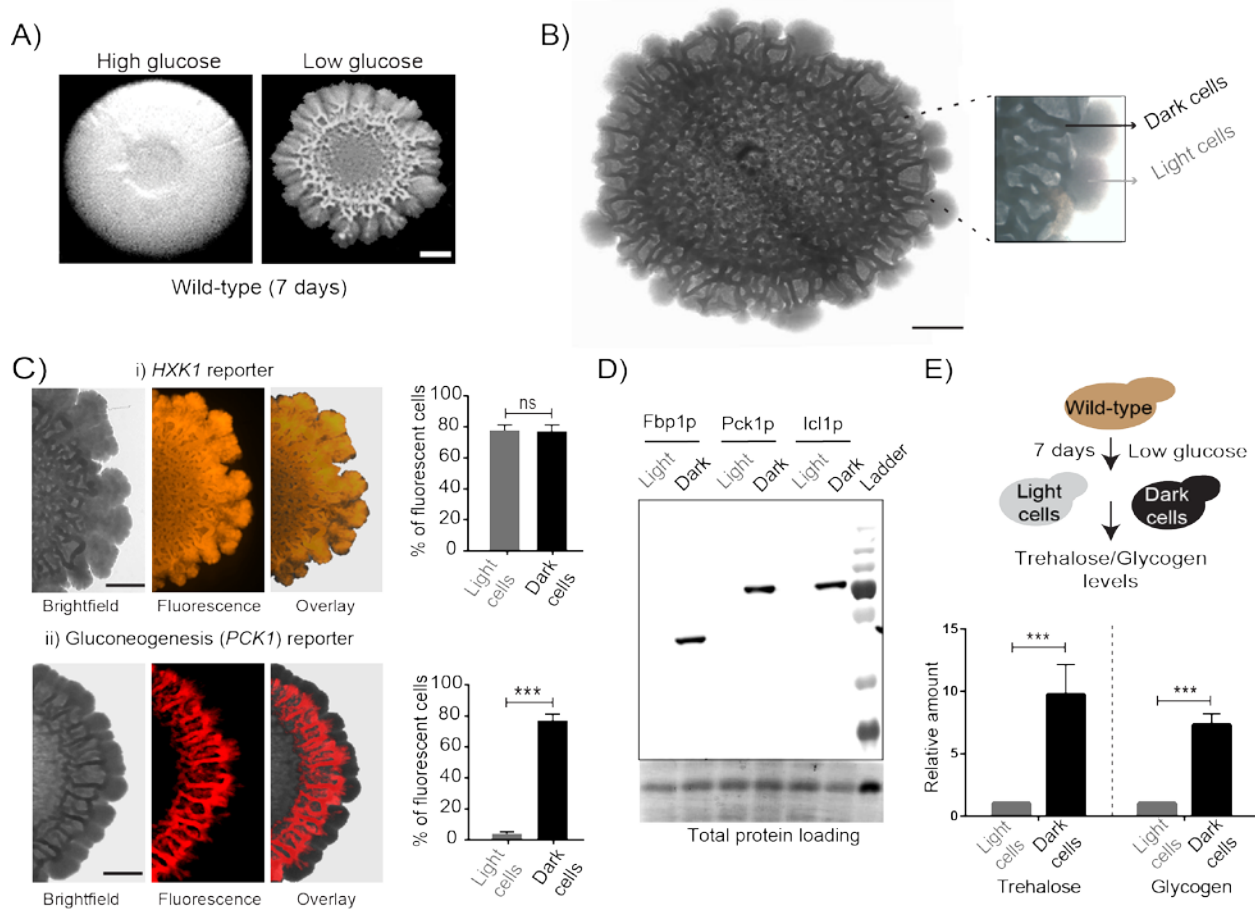

747  
748  
749  
750  
751  
752  
753  
754  
755  
756  
757  
758  
759  
760  
761  
762  
763  
764  
765  
766  
767  
768  
769

**Figure 1: Cells within *S. cerevisiae* colonies exhibit ordered metabolic specialization**

A) Low glucose is required for rugose colonies to develop. The panel shows the morphology of mature yeast colonies in rich medium, with supplemented glucose as the sole variable. Scale bar: 2 mm.

B) Reconstructed bright-field images of a mature wild-type colony. Within the colony, a network of dark and bright regions is clearly visible, as classified based purely on optical density. We classify the cells in the dark region as dark cells, and in the peripheral light region as light cells. Scale bar: 2 mm.

C) Spatial distribution of mCherry fluorescence across a colony, indicating the activity of (i) a reporter for hexokinase (*HXK1*) activity, or (ii) a gluconeogenesis dependent reporter (*PCK1*), in two different colonies. The percentage of fluorescent cells (in isolated light and dark cells from the respective colonies) were also estimated by flow cytometry, and is shown as bar graphs. Scale bar: 2 mm. Also see Figures S1A and S1B for more information.

D) Western blot based detection of proteins involved in gluconeogenesis (Fbp1p and Pck1p), or associated with increased gluconeogenic activity (Icl1p), in isolated dark or light cells. The blot is representative of three biological replicates.

E) Comparative steady-state amounts of trehalose and glycogen (as gluconeogenesis end point metabolites), in light and dark cells.

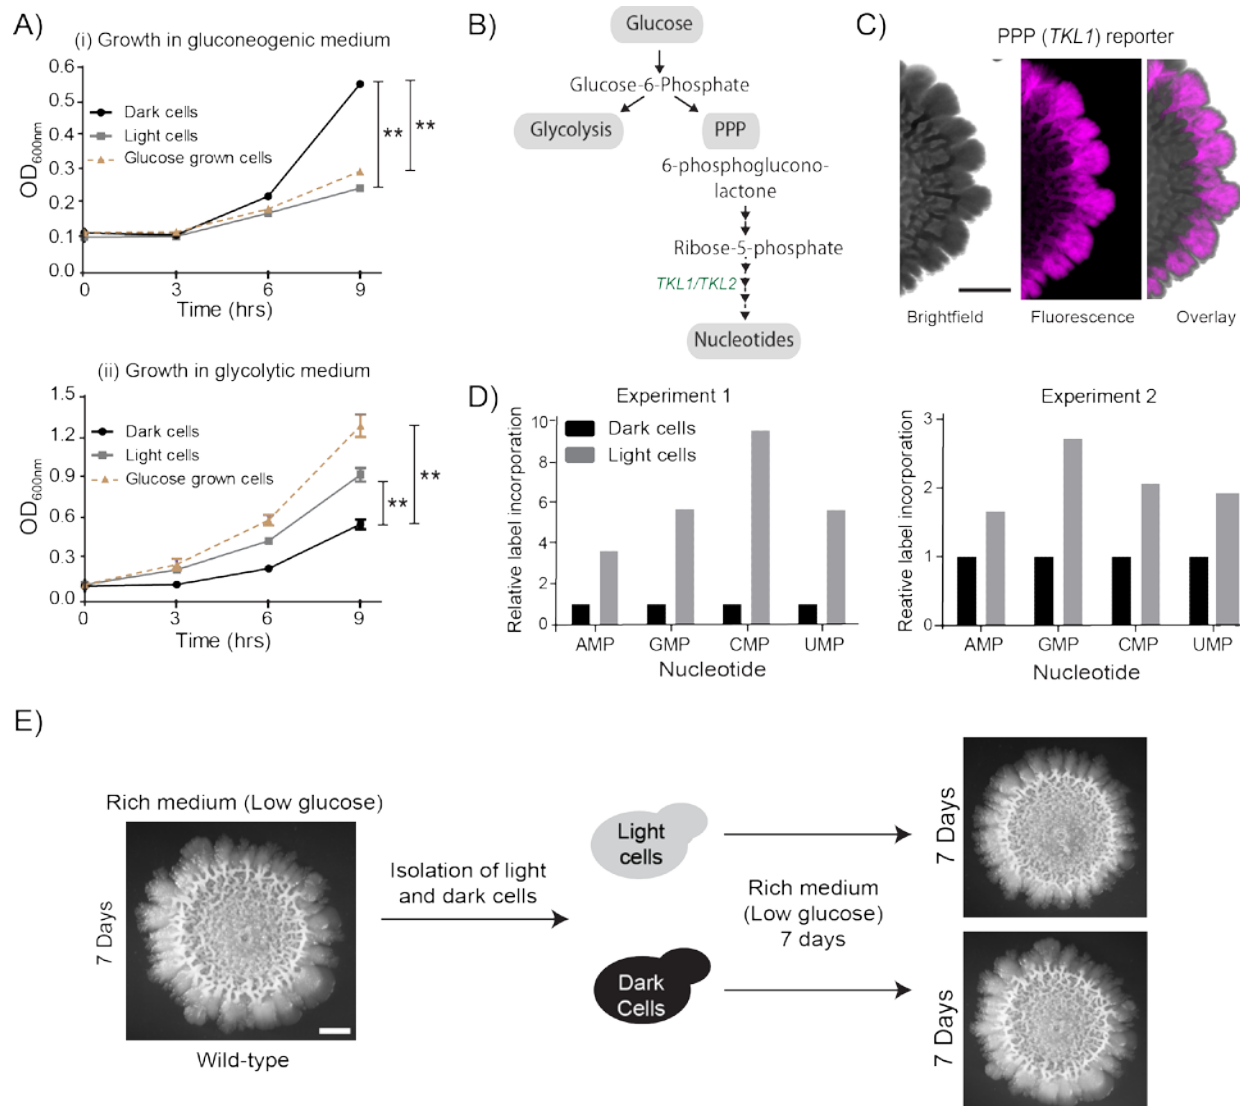

770  
771  
772  
773  
774  
775  
776  
777  
778  
779  
780  
781  
782  
783  
784  
785  
786  
787

**Figure 2: Cells organize into spatially restricted, contrary metabolic states within the colony**

A) Comparative immediate growth of isolated light cells and dark cells, transferred to a 'gluconeogenic medium' (2% ethanol as carbon source), or a 'glycolytic medium' (2% glucose as carbon source), based on increased absorbance (OD<sub>600</sub>) in culture. Wild-type cells growing in liquid medium (2% glucose) in log phase (i.e. in a glycolytic state) were used as controls for growth comparison.

B) A schematic showing metabolic flow in glycolysis and the pentose phosphate pathway (PPP), and also illustrating the synthesis of nucleotides (dependent upon pentose phosphate pathway).

*TKL1* controls an important step in the PPP, and is strongly induced during high PPP flux.

C) Spatial distribution of mCherry fluorescence across a colony, based on the activity of a PPP-dependent reporter. Scale bar: 2 mm. Also see Figure S1A.

D) Comparative metabolic-flux based analysis comparing <sup>15</sup>N incorporation into newly synthesized nucleotides, in dark and light cells. Also see S2, and Materials and Methods.

E) Light cells and dark cells isolated from a 7-day old wild-type complex colony re-form indistinguishable mature colonies when re-seeded onto fresh agar plates, and allowed to develop for 7 days. Scale bar = 2mm.

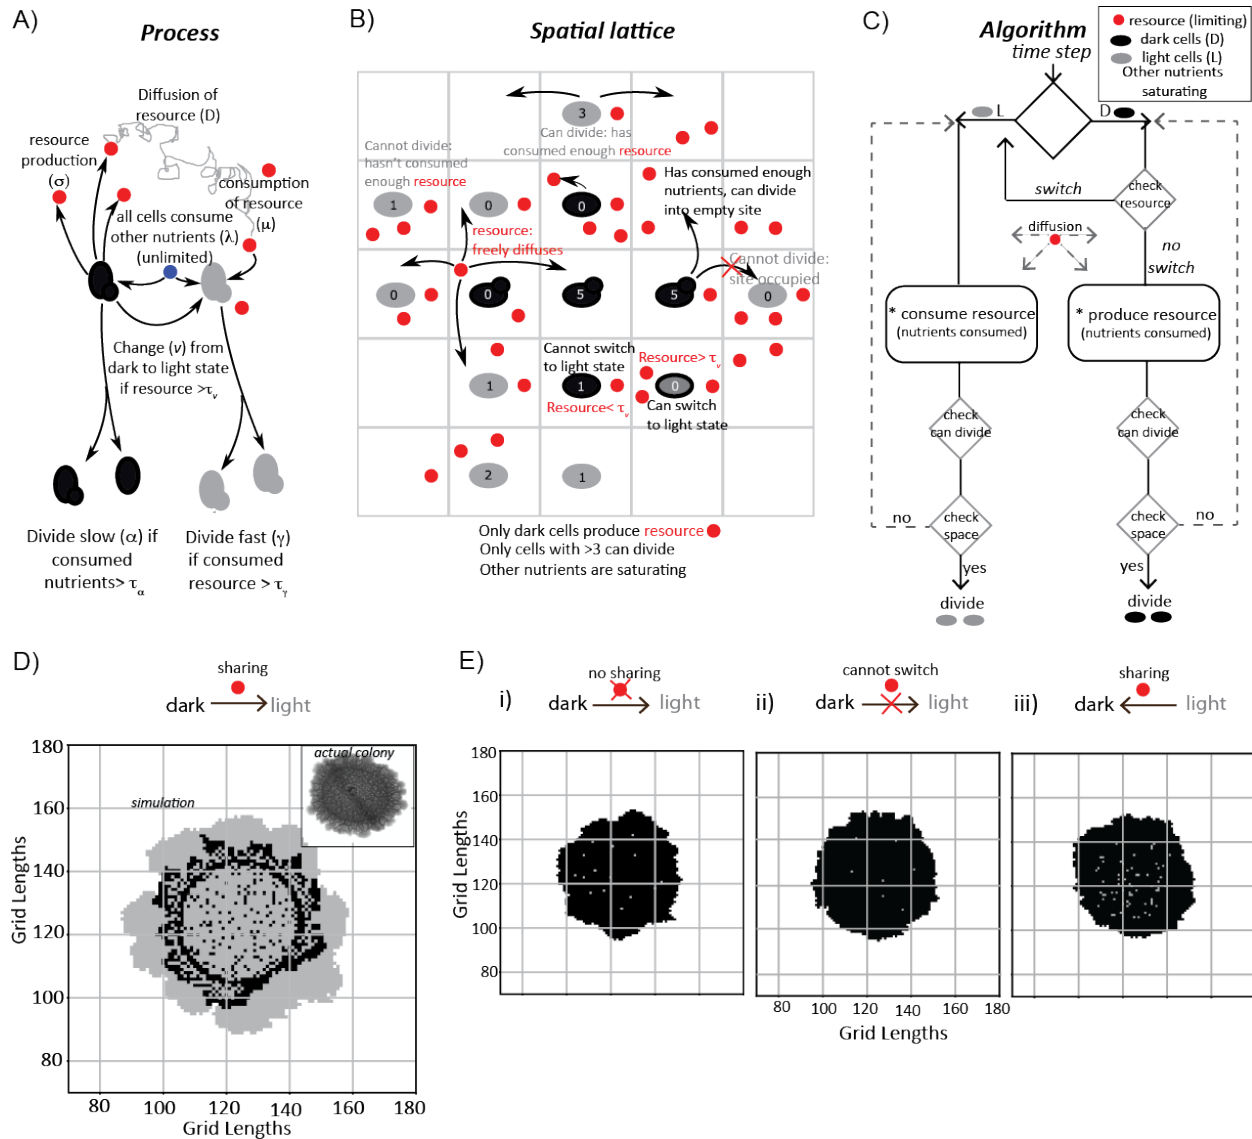

788  
789  
790  
791  
792  
793  
794  
795  
796  
797  
798  
799  
800  
801  
802

**Figure 3: A mathematical model suggests constraints for the emergence and organization of cells in complimentary metabolic states.**

A) Processes, based on experimental data, incorporated into developing a simple mathematical model to simulate colony development. The dark and light cells are appropriately colored, and the parameters incorporated are resource production ( $\sigma$ ), diffusion parameters for the resource (D), consumption of the resource ( $\mu$ ), and fast or slow rates of division ( $\alpha$  or  $\gamma$ ), based on resource or amino acid consumption.

B) The spatial distribution of cells is reduced to a grid like lattice within the model, to allow coarse graining of the location of cells across a colony. The rules for cell division and expansion incorporate the ability to consume existing nutrients in the medium, produce a resource and/or consume a produced resource, and a threshold amount of resource build up before utilization.

C) A flow-chart of the algorithm used in the mathematical model. The decision making process in the algorithm, incorporating all the elements described in panels (A) and (B) is illustrated.

Also see Figure S2 and Materials and Methods.

803 D) A simulation of the development of a wild-type colony, based on the default model  
804 developed. The inset shows an image of a real wild-type colony, which has developed for an  
805 equivalent time (~6 days). [Also Figure S2 and Movie S1.](#)

806 E) A simulation of colony development using the model, where key parameters have been  
807 altered.

808 (i) The sharing of a produced resource is restricted.

809 (ii) The ability to switch from a dark to a light state is restricted.

810 (iii) Light cells produce a resource taken up by dark cells is included.

811 Note that in all three scenarios the colony size remains small, and fairly static. [Also see Figure](#)  
812 [S3 and Movies S2, S3 and S4.](#)

813

814

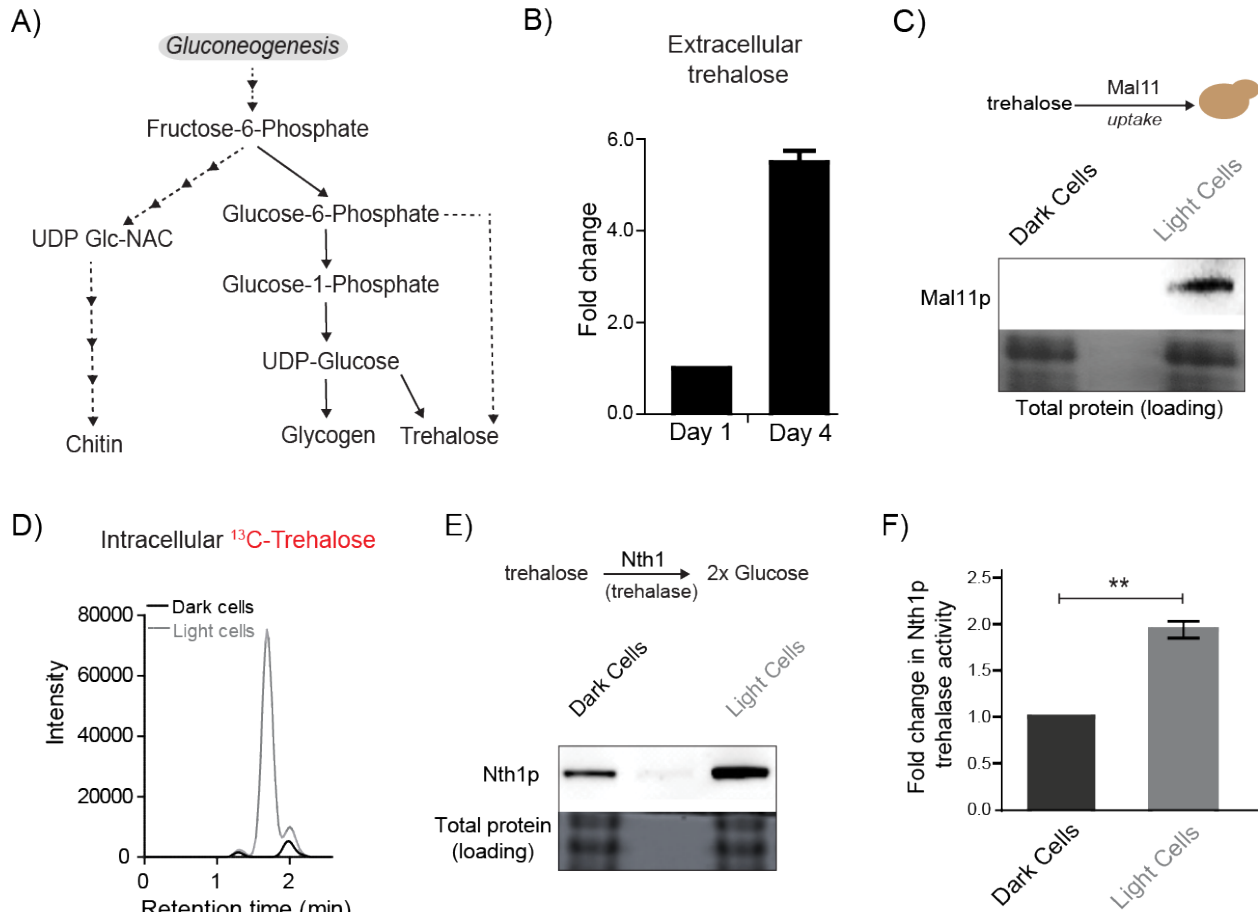

815  
816  
817  
818  
819  
820  
821  
822  
823  
824  
825  
826  
827  
828  
829  
830  
831  
832  
833

**Figure 4: Trehalose satisfies criteria to be the metabolic resource determining the emergence of light cells.**

A) A schematic illustrating the metabolic intermediates and different end-point metabolites of gluconeogenesis.

B) Extracellular amounts of trehalose measured from developing wild-type colonies. Entire colonies were isolated, and only exogenous trehalose estimated, at the respective days.

C) Comparative protein amounts of Mal11, a major transporter of trehalose in *S. cerevisiae*, in light and dark cells, as measured using a Western blot is shown. The blot is representative of 3 independent experiments.

D) Estimates of the relative ability of light and dark cells to uptake trehalose is shown.  $^{13}\text{C}$  Trehalose was exogenously added to light and dark cells, and intracellular amounts of the same are shown (as intensity of the MS/MS peak corresponding to  $^{13}\text{C}$ -trehalose).

E) Comparative amounts of Nth1, the major intracellular trehalase enzyme in *S. cerevisiae*, in light and dark cells, as measured using a Western blot is shown. The blot is representative of 3 independent experiments.

F) *in vitro* neutral trehalase activity present in lysed light or dark cells is shown. The data represents mean $\pm$ SD, n=3 (p<0.01).

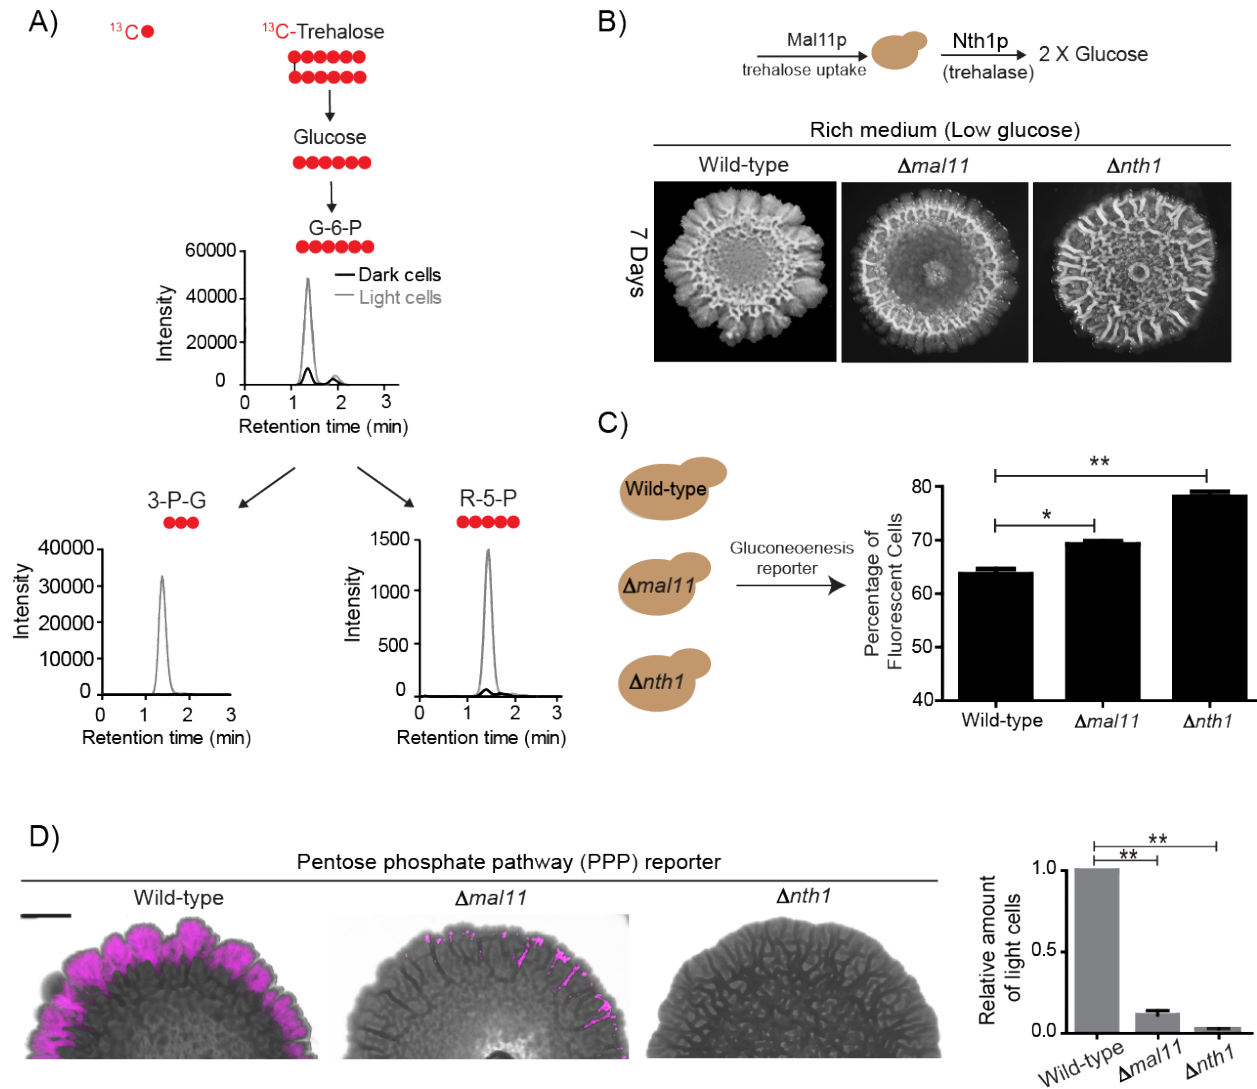

834

835 **Figure 5: Trehalose uptake and utilization determines the existence of light cells.**

836 A) Estimation of trehalose uptake and breakdown/utilization in light and dark cells. LC-MS/MS  
 837 based metabolite analysis, using exogenously added  $^{13}\text{C}$  Trehalose, to compare breakdown and  
 838 utilization of  $^{13}\text{C}$  Trehalose for glycolysis and the PPP, in light and dark cells. The red circles  
 839 represent  $^{13}\text{C}$  labeled carbon atoms. Data for  $^{13}\text{C}$  labeled glycolytic and PPP intermediates  
 840 (derived from trehalose) are shown. The data presented is from a single flux experiment, which  
 841 was repeated independently (with different colonies) twice. Also see Figure S4.

842 B) Comparative development of wild-type colonies with colonies lacking the major trehalose  
 843 transporter (*Dmal11*), or the intracellular neutral trehalase (*Dnth1*). Colonies are shown after 7-  
 844 days of development. Scale bar: 2 mm.

845 C) Estimate of the percentage of gluconeogenic cells in wild-type, *Δmal11* and *Δnth1* (strains  
 846 that cannot up-take or breakdown trehalose). This was based on quantifying the expression of  
 847 the gluconeogenesis reporter plasmid (pPCK1-mCherry), expressed in all these cells. Cells from  
 848 the entire colony were isolated and percentage of fluorescent cells (i.e. cells expressing the  
 849 gluconeogenic reporter) in each colony was calculated by analyzing the samples by flow  
 850 cytometry. Error bar represents standard error of mean (SEM) \* =  $P < 0.05$ , \*\* =  $P < 0.01$ .

851 D) Visualization (right panel) and quantification (left bar graphs) of light cells in wild-type,  
852 *Δmal11*, or *Δnth1* cells, based on fluorescence emission dependent upon the PPP reporter  
853 activity. The quantification is based on FACS data. Scale bar: 2 μm.

854



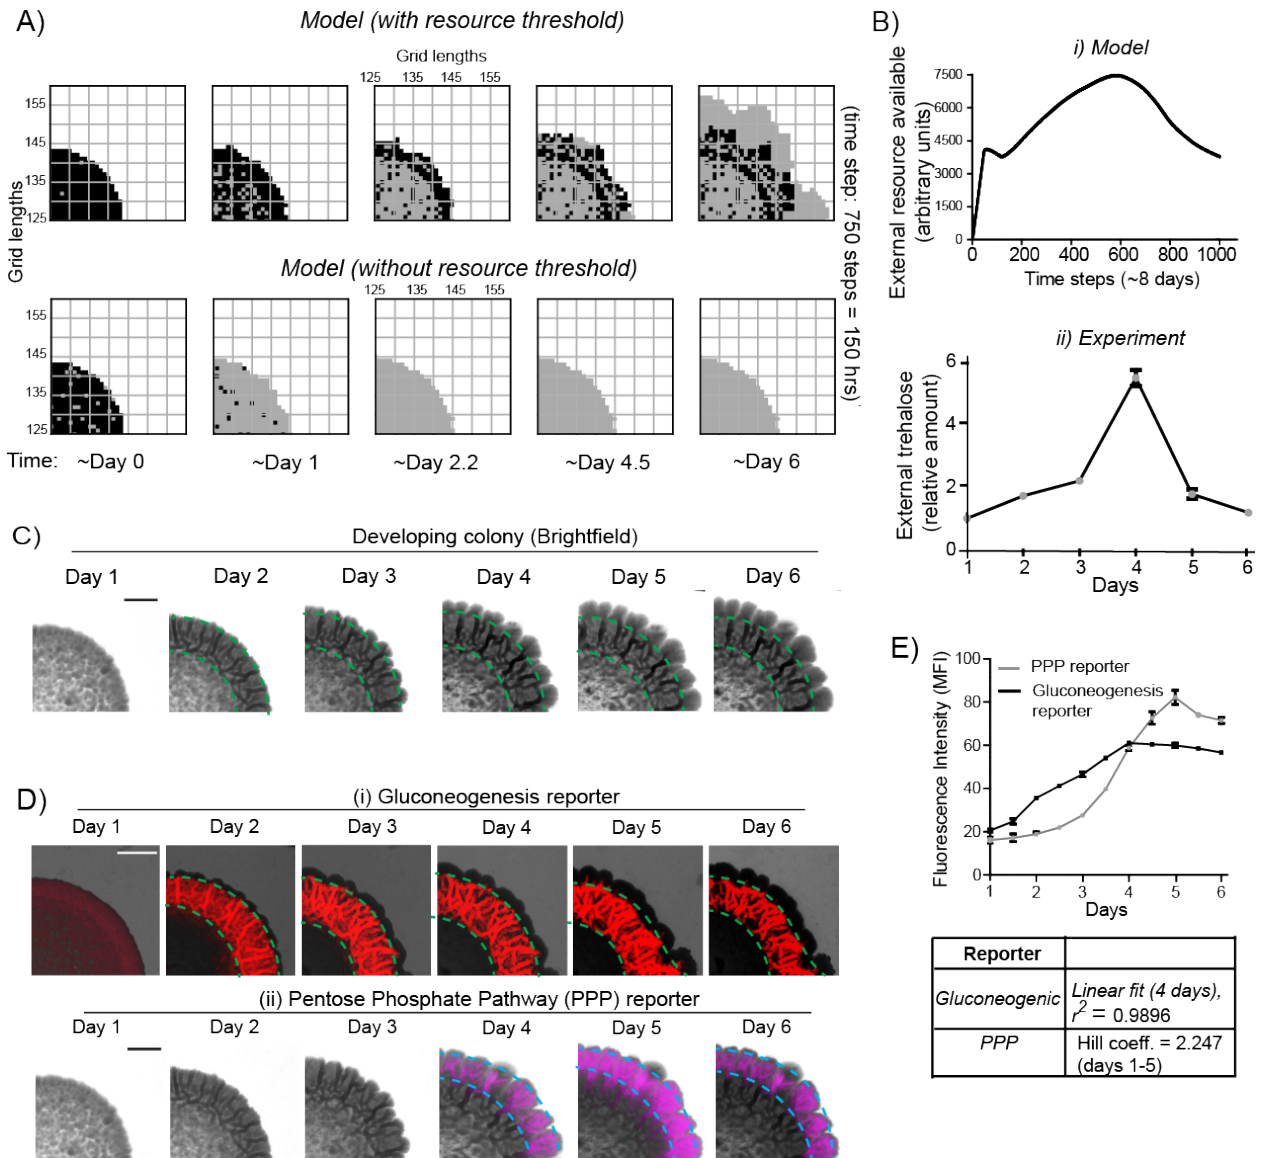

855  
856 **Figure 6: A resource threshold effect controls cooperative switching of cells to the light**  
857 **state.**

858 A) Simulation of colony development, based on the default model (which incorporates a  
859 resource threshold buildup, followed by consumption, switching to a light state, and expansion),  
860 compared to a model where the threshold amounts of the resource is removed. Note the final  
861 expansion size of the colony. [Also see Figure S5 and Movie S5.](#)

862 B) i) Changes in the availability of the resource as the colony develops, based on the model. ii)  
863 Extracellular amounts of trehalose measured from developing wild-type colonies. Data from  
864 three independent colonies.

865 Note: in the model, in ~3-4 days the resource is highest, and reduces sharply after that. In the  
866 experimentally obtained data, extracellular trehalose amounts are highest at ~day 4, and then  
867 rapidly decreases over day 5. This correlates to when the light cells emerge and expand.

868 C) A time-course of bright-field images of the developing wild-type colony, illustrating the  
869 distribution of dark cells, and the emergence and distribution of light cells.



870 D) A time-course revealing fluorescence based estimation of the (i) reporter for gluconeogenic  
871 activity (dark cells), or (ii) the PPP activity reporter (light cells). Note the delayed, rapid  
872 appearance and increase in the PPP activity reporter.  
873 E) Quantification of the increase in the gluconeogenic reporter activity in the colony, and the  
874 PPP reporter activity (based on fluorescence intensity) within the colony. The increase in  
875 gluconeogenic reporter activity, when plotted, is linear, and saturates. The increase in PPP  
876 activity over the first 5 days is highly cooperative (as estimated using a Hill coefficient as a proxy  
877 for cooperativity), before saturating.  
878  
879

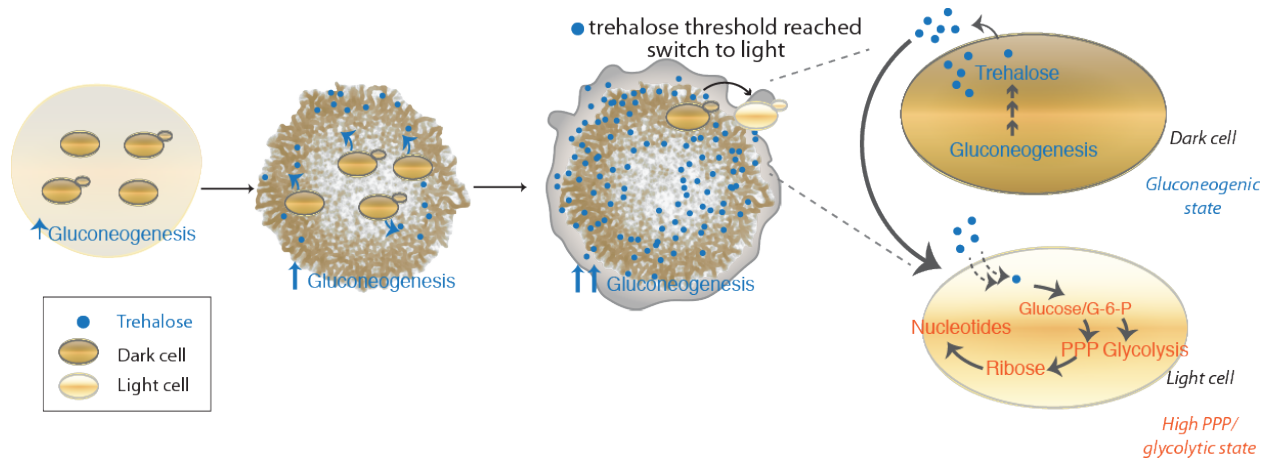

880  
881  
882  
883  
884  
885  
886  
887  
888  
889  
890  
891  
892

**Figure 7: A simple model to explain emergent phenotypic heterogeneity and organization.**

Cells in low glucose perform gluconeogenesis, as required in low glucose medium. As gluconeogenic reserves build up, trehalose builds up in the extracellular environment. At a threshold concentration of trehalose, some cells switch to a high glycolytic, PPP state. This state depends upon the utilization of trehalose to fuel it. This utilization of trehalose by the light cells results in decreased external trehalose to below a threshold. This in turn restrains the other, remaining cells in a gluconeogenic state, where they continue to produce trehalose. This gives rise to the final, self-organized community, with specialization of function and division of labor.

893 **Supplementary Figures**

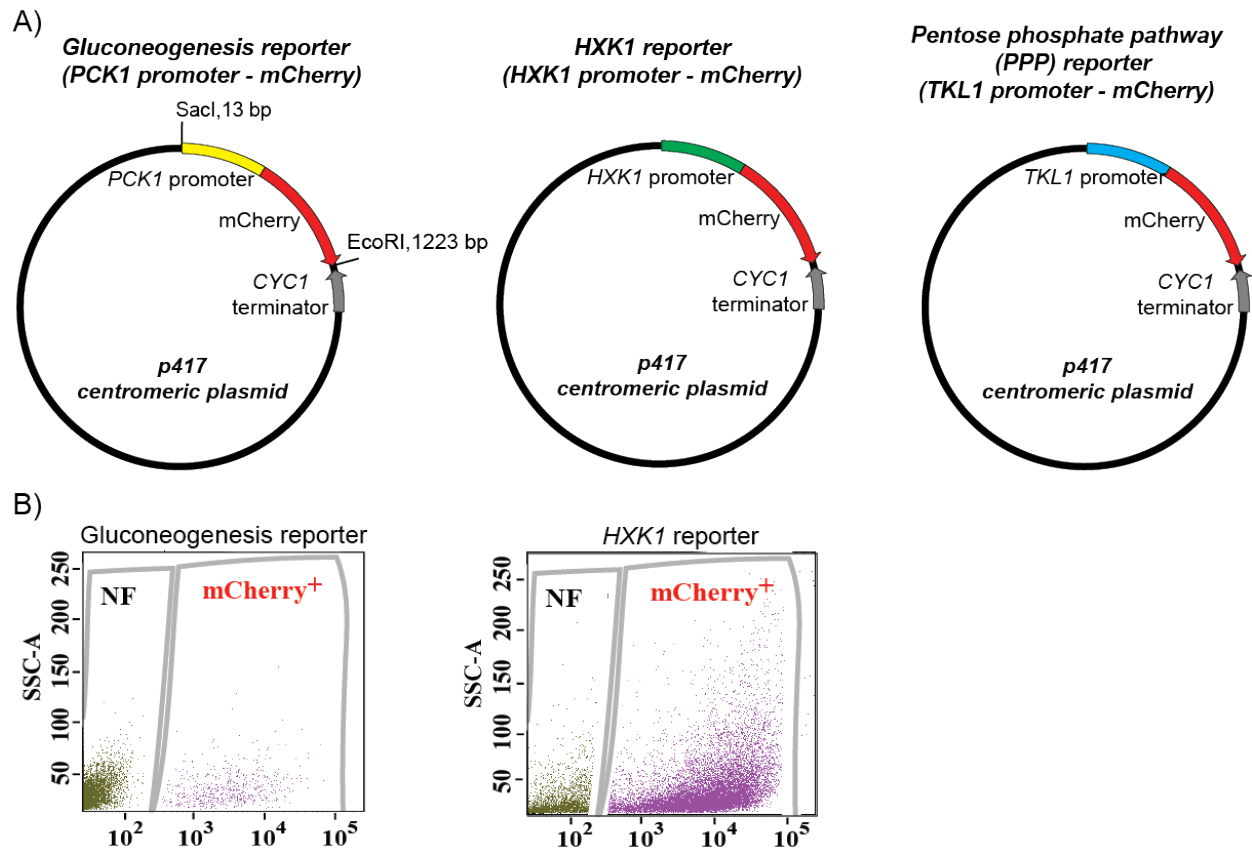

**Figure S1: Gluconeogenesis activity is spatially restricted.**

(A) Plasmid maps of the different reporters used in this study. Gene cassette containing the specific promoter and mCherry was cloned into the p417 centromeric plasmid using the *SacI* and *EcoRI* restriction sites.

(B) Scatter plot depicting distribution of mCherry positive light cells isolated from wild-type colonies with the gluconeogenesis or HXK1 reporter. SSC-A represents side scatter measurement and NF represents non-fluorescent population.

894

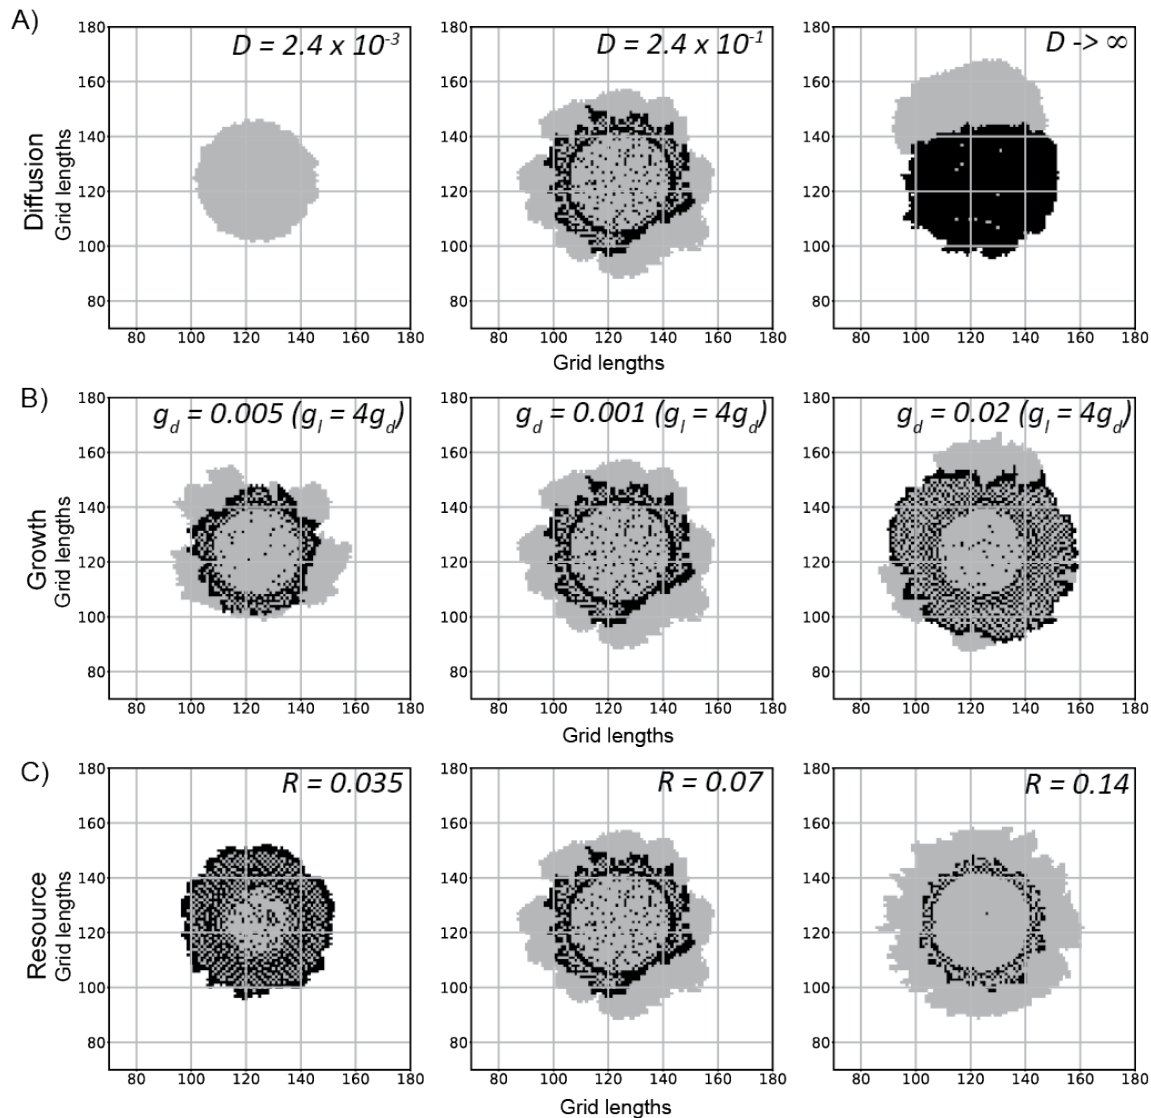

**Figure S2: Effects on the colony as we change single parameters used in the model.**

(A) Changing the diffusion constant ( $D$  [ $L^2T^{-1}$ ]) of the resource in the medium. The diffusion constant used to simulate the left panel colony is 100 times smaller than the default colony (middle panel). The right panel colony was simulated with a very large effective diffusion constant. To get this fast diffusion, the total available resource was uniformly redistributed over the grid between every two time steps. Thus, every grid location had the same level of resource before the cells consume or produce it, as if the resource diffused very quickly over the grid.

(B) Changing the growth rate of the cells.  $g_d$  and  $g_l$  are growth rate parameters of the dark and light cells respectively. The light cells grow 4 times faster than the dark cells in all cases. The middle panel colony is the default colony.  $g_d = 0.01$ . The one on the left has half the growth rate and the one on the right has twice the growth rate in comparison.

(C) Changing the resource ( $R$ ) produced by the dark cells. The light cells consume resource at a fixed rate if available. The middle panel has  $R = 0.07$ . The left colony simulation has half the produced value and the right colony simulation has double the produced value.

All colony simulations were started with 1257 grids (each containing  $\sim 100$  cells), of which 99% were dark cells, and were run for 750 time steps.

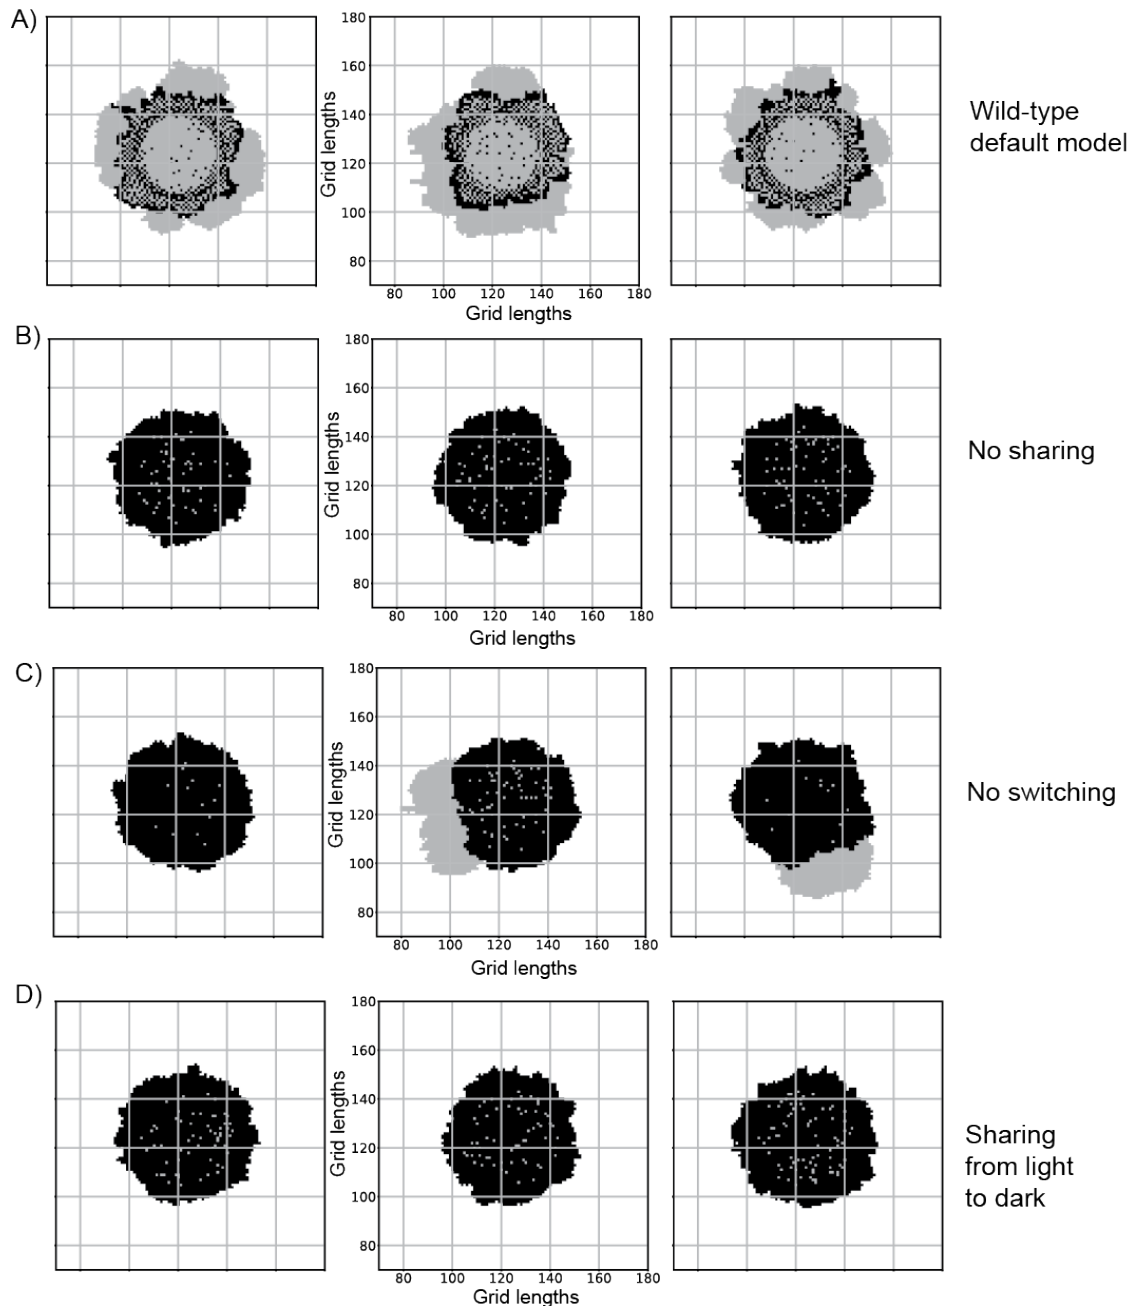

**Figure S3: Reproducibility of the model, under different scenarios.**

Since the colony simulations have elements of stochasticity present in the model, presented are a few replicate colonies from independent simulation. These showcase crucial and reproducible aspects of the different conditions explored in figure 4D and figure 4E.

(A) 3 wild-type colonies generated with the default parameter set. The common features are a circular centre with mostly light cells, an annular region with dark cells and a few light cells, and the colony periphery with mostly light cells.

(B) 3 replicate colonies with the "no sharing" condition. The dark cells do not produce any shared resource. The final colonies have mostly dark cells as the number of light cells doesn't change.

(C) 3 replicate colonies with the "no switching" condition. If there are a few light cells at the periphery, they can consume the shared resource produced by the dark cells and grow into the empty space. However, the centre of the colonies has mostly dark cells.

(D) 3 replicate colonies with the "wrong sharing" condition (sharing of a resource made by light cells, taken up by dark cells), which are similar to the "no sharing" condition.

897

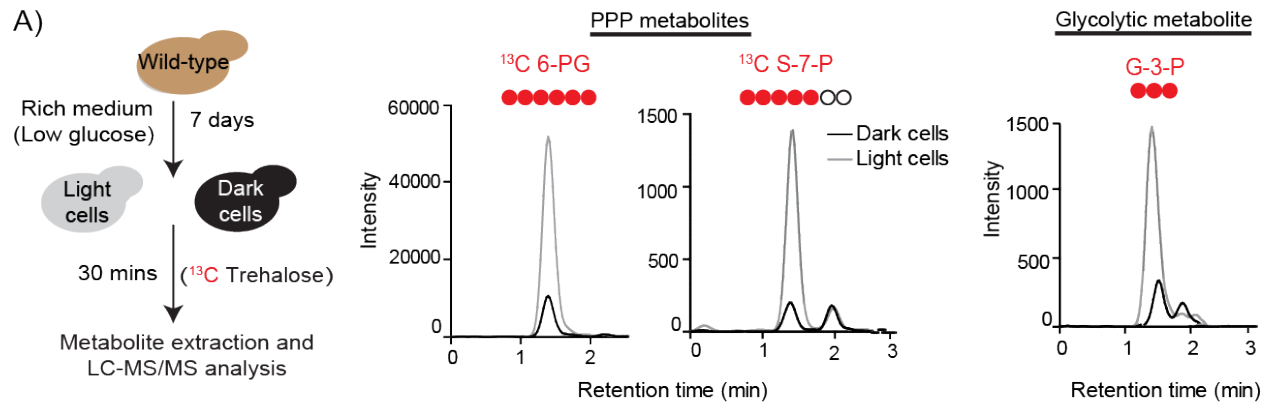

**Figure S4: Comparative breakdown of labeled trehalose by distinct cells in a colony.**

(A) Trehalose breakdown by light cells and dark cells were monitored by isolating light and dark cells from a ~5 to 6-day old wild-type colony and incubating them briefly (30 min) with labeled  $^{13}\text{C}$  Trehalose. Post incubation, metabolites from light and dark cells were extracted and analyzed for the pentose phosphate pathway (PPP) intermediates  $^{13}\text{C}$  6-phosphogluconate ( $^{13}\text{C}$  6-PG),  $^{13}\text{C}$  Sedoheptulose-7-phosphate ( $^{13}\text{C}$  S-7-P) and glycolytic intermediate  $^{13}\text{C}$  Glyceraldehyde-3-phosphate ( $^{13}\text{C}$  G-3-P) using LC-MS/MS.

898

899

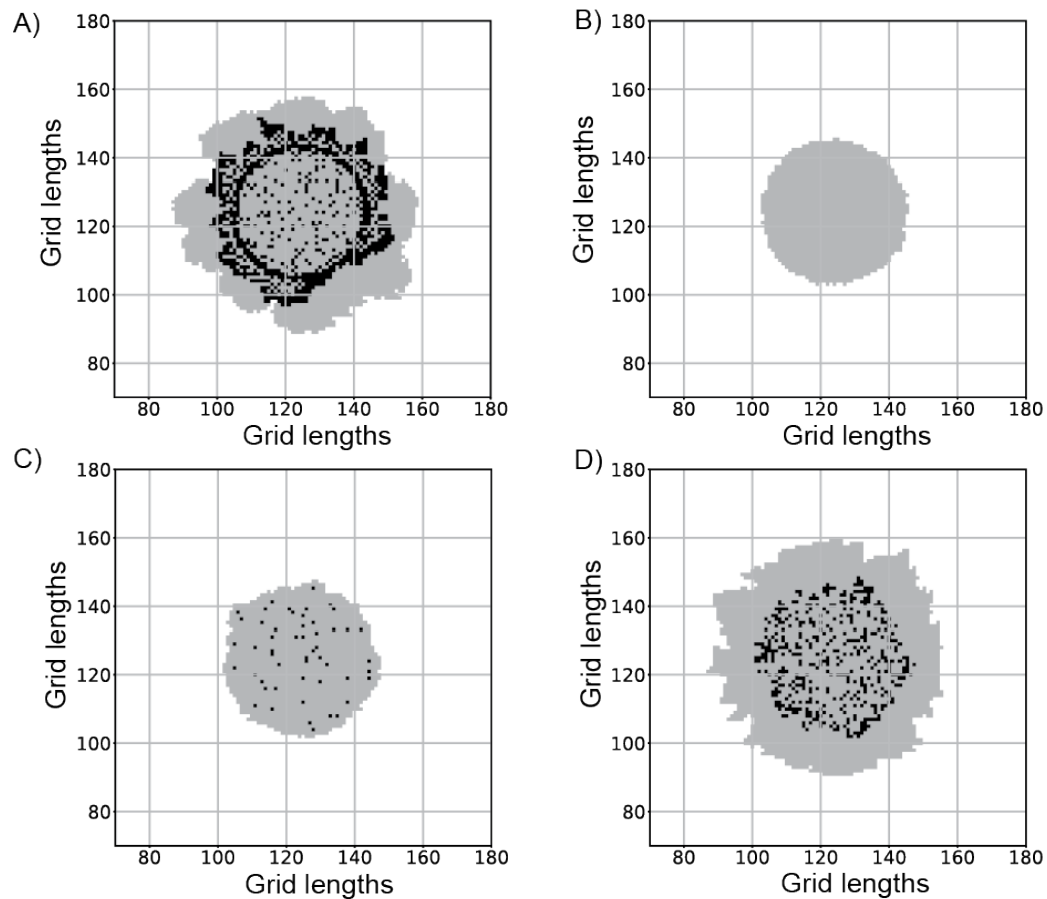

**Figure S5: Colonies generated using different switching rules.**

(A) Wild-type colony with a resource threshold switching rule. In every time step, the algorithm checks if the shared resource levels at the locations of dark cells are more than a threshold value of 3 units. If so, there is a 50% chance of those cells switching to light cells.

(B) A colony generated without the need for a resource threshold level. Dark cells switch by random chance. Light cells cannot switch to dark.

(C) & (D) Colonies generated using a linear switching rule. The probability of switching increases linearly with the locally available resource levels till a maximum value of 1.0. The probability of switching is of the form  $p = mU$  (if  $mU$  less than 1.0) and  $p = 1.0$  otherwise. Here  $U$  is the resource level at the location of the dark cells and  $m$  is the slope of the linear relationship. In panel (C)  $m = 1$ . In panel (D)  $m = 0.01$ .

900

901
